# Supplementary material for: Bilateral high-frequency hearing loss is associated with elevated blood pressure and increased hypertension risk in occupational noise exposed workers
Source: PLoS One. 2019 Sep 5;14(9):e0222135. doi: 10.1371/journal.pone.0222135 (PMC6728038; doi:10.1371/journal.pone.0222135)
Supplement: S1 Table — (CSV) [file pone.0222135.s001.csv]

Location	Enterprise size	Economic type	Sex	Age	Occupational noise exposure time	Systolic blood pressure	Diastolic blood pressure	hypertension	Group by bilateral high-frequency tone average	Group by occupational noise exposure time	Economic type2
2	2	3	2	42	#NULL!	109	81	0	3	#NULL!	2
3	3	1	1	45	#NULL!	117	78	0	3	#NULL!	1
3	2	3	1	48	#NULL!	123	80	0	3	#NULL!	2
3	3	1	1	51	#NULL!	108	69	0	3	#NULL!	1
2	3	3	1	53	#NULL!	157	96	1	3	#NULL!	2
3	3	1	1	49	#NULL!	99	67	0	3	#NULL!	1
3	2	3	1	52	#NULL!	142	91	1	3	#NULL!	2
2	2	3	1	42	#NULL!	144	99	1	3	#NULL!	2
2	2	3	1	46	#NULL!	121	78	0	3	#NULL!	2
2	2	3	1	48	#NULL!	132	83	0	3	#NULL!	2
3	2	3	1	47	#NULL!	138	88	0	3	#NULL!	2
3	2	3	1	49	#NULL!	162	100	1	3	#NULL!	2
1	3	3	1	27	#NULL!	113	71	0	3	#NULL!	2
2	2	3	1	42	#NULL!	113	69	0	3	#NULL!	2
2	3	3	1	52	#NULL!	137	98	1	3	#NULL!	2
3	3	3	1	43	#NULL!	137	86	0	3	#NULL!	2
3	3	3	1	43	#NULL!	138	88	0	3	#NULL!	2
3	3	3	1	45	#NULL!	160	92	1	3	#NULL!	2
3	2	3	1	53	#NULL!	128	83	0	3	#NULL!	2
2	2	3	2	45	#NULL!	109	64	0	3	#NULL!	2
3	2	3	1	44	#NULL!	125	68	0	3	#NULL!	2
2	3	3	1	47	#NULL!	111	79	0	3	#NULL!	2
3	3	3	1	31	#NULL!	133	68	0	3	#NULL!	2
2	3	3	1	31	#NULL!	121	78	0	3	#NULL!	2
3	2	3	1	42	#NULL!	118	73	0	3	#NULL!	2
3	2	3	1	56	#NULL!	148	86	1	3	#NULL!	2
3	2	3	1	49	#NULL!	104	60	0	3	#NULL!	2
3	3	1	1	44	#NULL!	125	84	0	3	#NULL!	1
2	3	3	1	51	#NULL!	138	86	0	3	#NULL!	2
3	2	3	1	49	#NULL!	131	82	0	3	#NULL!	2
3	3	1	1	45	#NULL!	150	100	1	3	#NULL!	1
2	2	1	1	28	#NULL!	114	65	0	3	#NULL!	1
3	2	3	1	48	#NULL!	128	81	0	3	#NULL!	2
3	2	3	1	47	#NULL!	132	88	0	3	#NULL!	2
3	3	3	1	50	#NULL!	138	88	0	3	#NULL!	2
3	3	1	1	51	#NULL!	129	74	0	3	#NULL!	1
1	3	3	1	55	#NULL!	122	78	0	3	#NULL!	2
3	2	3	1	51	#NULL!	130	85	0	3	#NULL!	2
2	2	3	2	24	#NULL!	90	60	0	3	#NULL!	2
1	2	3	1	25	#NULL!	113	67	0	3	#NULL!	2
3	3	1	1	44	#NULL!	113	66	0	3	#NULL!	1
3	3	1	1	47	#NULL!	103	72	0	3	#NULL!	1
3	2	3	1	55	#NULL!	127	72	0	3	#NULL!	2
3	2	3	1	51	#NULL!	138	80	0	3	#NULL!	2
3	2	3	1	38	#NULL!	107	75	0	3	#NULL!	2
3	2	3	1	46	#NULL!	115	72	0	3	#NULL!	2
2	2	3	1	52	#NULL!	127	89	0	3	#NULL!	2
1	2	3	1	21	#NULL!	107	70	0	3	#NULL!	2
2	3	3	1	47	#NULL!	101	64	0	3	#NULL!	2
3	2	3	1	41	#NULL!	131	77	0	3	#NULL!	2
3	2	3	1	58	#NULL!	171	99	1	3	#NULL!	2
3	3	1	2	30	#NULL!	101	60	0	3	#NULL!	1
3	2	3	2	47	#NULL!	123	75	0	3	#NULL!	2
1	2	3	1	28	#NULL!	115	60	0	3	#NULL!	2
2	2	3	1	36	#NULL!	115	75	0	3	#NULL!	2
2	2	3	1	40	#NULL!	108	76	0	3	#NULL!	2
3	2	3	1	51	#NULL!	119	75	0	3	#NULL!	2
2	2	3	2	40	#NULL!	102	69	0	3	#NULL!	2
2	2	3	2	43	#NULL!	121	64	0	3	#NULL!	2
2	2	3	2	46	#NULL!	118	71	0	3	#NULL!	2
2	3	3	1	38	#NULL!	122	82	0	3	#NULL!	2
3	3	1	1	40	#NULL!	127	76	0	3	#NULL!	1
3	2	3	1	45	#NULL!	124	76	0	3	#NULL!	2
3	3	3	1	62	#NULL!	140	72	1	3	#NULL!	2
3	3	1	2	41	#NULL!	93	60	0	3	#NULL!	1
3	3	1	1	37	#NULL!	105	66	0	3	#NULL!	1
2	2	3	1	37	#NULL!	118	74	0	3	#NULL!	2
1	3	3	1	36	#NULL!	125	79	0	3	#NULL!	2
1	3	3	1	39	#NULL!	136	85	0	3	#NULL!	2
3	3	1	1	45	#NULL!	128	84	0	3	#NULL!	1
3	2	3	1	52	#NULL!	139	88	0	3	#NULL!	2
3	3	1	1	44	#NULL!	104	61	0	3	#NULL!	1
2	3	3	1	46	#NULL!	108	82	0	3	#NULL!	2
2	2	3	1	46	#NULL!	123	89	0	3	#NULL!	2
2	2	3	1	56	#NULL!	156	99	1	3	#NULL!	2
2	3	3	1	52	#NULL!	166	109	1	3	#NULL!	2
1	3	3	1	26	#NULL!	125	77	0	3	#NULL!	2
3	2	3	1	48	#NULL!	115	72	0	3	#NULL!	2
3	3	1	1	47	#NULL!	125	73	0	3	#NULL!	1
3	3	3	1	47	#NULL!	127	75	0	3	#NULL!	2
2	2	3	1	50	#NULL!	130	92	1	3	#NULL!	2
3	3	1	1	51	#NULL!	114	82	0	3	#NULL!	1
3	3	3	1	61	#NULL!	168	93	1	3	#NULL!	2
2	3	3	1	37	#NULL!	122	89	0	3	#NULL!	2
3	3	1	1	47	#NULL!	113	74	0	3	#NULL!	1
3	3	1	1	49	#NULL!	139	86	0	3	#NULL!	1
3	2	3	1	42	#NULL!	125	80	0	2	#NULL!	2
2	1	1	2	35	1	118	76	0	3	1	1
3	4	3	1	27	0	132	84	0	3	1	2
3	3	3	1	55	1	158	94	1	3	1	2
3	4	3	1	42	0	156	96	1	3	1	2
2	4	4	1	39	1	124	76	0	3	1	3
2	4	4	1	47	1	138	86	0	3	1	3
2	3	3	1	48	1	108	64	0	3	1	2
3	4	3	1	44	0	136	88	0	3	1	2
3	4	3	2	22	1	108	68	0	3	1	2
3	3	3	1	49	1	147	92	1	3	1	2
3	3	3	1	47	1	115	76	0	3	1	2
2	3	3	1	44	1	126	74	0	3	1	2
2	3	3	1	53	1	128	86	0	3	1	2
2	3	3	1	28	1	120	76	0	3	1	2
2	3	3	1	49	1	144	91	1	3	1	2
2	3	3	1	29	1	114	76	0	2	1	2
2	3	3	1	18	1	120	84	0	2	1	2
2	3	3	1	39	1	90	61	0	2	1	2
2	3	3	1	39	1	91	61	0	2	1	2
2	1	3	1	37	1	112	62	0	2	1	2
2	2	3	1	35	1	116	68	0	2	1	2
2	2	3	1	39	1	115	72	0	2	1	2
2	1	3	1	32	1	112	75	0	2	1	2
2	1	3	1	37	1	135	75	0	2	1	2
2	1	3	1	34	1	129	84	0	2	1	2
2	3	3	1	37	1	142	84	1	2	1	2
2	3	3	1	47	1	100	72	0	2	1	2
2	3	3	1	42	1	99	76	0	2	1	2
2	2	3	1	43	1	118	80	0	2	1	2
2	3	3	1	45	1	129	84	0	2	1	2
3	1	3	1	41	1	137	86	0	2	1	2
3	3	3	1	46	1	132	89	0	2	1	2
2	3	3	1	45	1	129	91	1	2	1	2
2	1	3	1	50	1	99	68	0	2	1	2
2	2	3	1	54	1	117	68	0	2	1	2
3	3	3	2	45	1	98	65	0	2	1	2
2	3	3	2	48	1	115	70	0	2	1	2
2	1	3	2	43	1	134	86	0	2	1	2
2	3	3	2	53	1	129	91	1	2	1	2
2	2	3	1	18	1	122	77	0	2	1	2
2	3	3	1	28	1	127	89	0	2	1	2
3	3	3	1	46	1	138	70	0	2	1	2
1	2	3	1	43	1	131	72	0	2	1	2
2	3	3	1	43	1	137	88	0	2	1	2
2	3	3	1	45	1	138	88	0	2	1	2
3	3	3	1	52	1	137	88	0	2	1	2
2	3	3	1	57	1	138	89	0	2	1	2
2	3	3	1	59	1	139	89	0	2	1	2
1	3	1	2	35	1	116	74	0	2	1	1
2	3	3	2	43	1	99	61	0	2	1	2
1	4	3	2	44	1	99	68	0	2	1	2
2	4	3	2	45	1	138	82	0	2	1	2
3	3	3	2	54	1	103	73	0	2	1	2
1	2	3	1	23	1	107	62	0	2	1	2
2	1	3	1	29	1	113	70	0	2	1	2
1	2	3	1	17	1	135	80	0	2	1	2
3	1	3	1	28	1	123	86	0	2	1	2
3	2	3	1	34	1	114	81	0	2	1	2
2	1	3	1	33	1	132	87	0	2	1	2
3	3	3	1	38	1	136	87	0	2	1	2
2	3	3	1	36	1	138	88	0	2	1	2
3	3	3	1	46	1	110	68	0	2	1	2
2	3	3	1	43	1	113	77	0	2	1	2
2	2	3	1	46	1	115	79	0	2	1	2
2	2	3	1	43	1	130	80	0	2	1	2
3	3	3	1	46	1	117	81	0	2	1	2
1	3	3	1	44	1	120	83	0	2	1	2
3	3	3	1	42	1	121	83	0	2	1	2
3	3	3	1	48	1	136	83	0	2	1	2
2	2	3	1	44	1	136	85	0	2	1	2
3	3	3	1	45	1	132	87	0	2	1	2
2	3	3	1	46	1	128	88	0	2	1	2
1	3	3	1	47	1	139	88	0	2	1	2
2	2	3	1	47	1	130	89	0	2	1	2
3	1	3	1	44	1	132	89	0	2	1	2
2	4	3	1	41	1	139	89	0	2	1	2
3	4	3	1	49	1	160	120	1	2	1	2
2	3	3	1	50	1	114	82	0	2	1	2
2	3	3	1	50	1	124	86	0	2	1	2
2	4	3	1	54	1	134	86	0	2	1	2
2	4	3	1	53	1	139	86	0	2	1	2
3	3	3	1	54	1	139	89	0	2	1	2
2	4	3	2	45	1	103	69	0	2	1	2
2	3	3	2	45	1	134	76	0	2	1	2
2	3	3	2	48	1	108	79	0	2	1	2
3	4	3	2	45	1	134	89	0	2	1	2
3	4	3	2	52	0	151	81	1	2	1	2
2	2	1	1	29	1	138	89	0	2	1	1
3	1	3	1	43	0	106	61	0	2	1	2
2	3	3	1	46	1	96	64	0	2	1	2
2	4	3	1	45	1	103	76	0	2	1	2
2	4	3	1	48	1	122	76	0	2	1	2
2	3	3	1	48	1	116	77	0	2	1	2
1	4	3	1	45	1	99	80	0	2	1	2
3	3	3	1	47	1	99	81	0	2	1	2
2	3	3	1	49	1	127	81	0	2	1	2
3	3	3	1	45	1	114	82	0	2	1	2
2	2	3	1	45	1	116	82	0	2	1	2
3	3	3	1	45	1	121	82	0	2	1	2
3	3	3	1	42	1	135	82	0	2	1	2
1	3	3	1	42	1	139	82	0	2	1	2
1	1	3	1	45	1	125	88	0	2	1	2
3	3	3	1	44	1	130	88	0	2	1	2
2	3	3	1	43	1	135	89	0	2	1	2
3	3	3	1	41	1	138	89	0	2	1	2
2	1	3	1	48	1	154	103	1	2	1	2
2	2	3	1	63	1	132	78	0	2	1	2
1	3	3	1	54	1	139	86	0	2	1	2
2	3	3	1	52	1	138	89	0	2	1	2
2	3	3	2	25	1	94	63	0	2	1	2
2	3	3	2	37	1	108	61	0	2	1	2
3	1	3	1	29	1	113	76	0	2	1	2
1	3	3	1	20	1	132	83	0	2	1	2
1	3	3	1	40	1	117	69	0	2	1	2
2	2	3	1	43	1	131	77	0	2	1	2
2	2	3	1	44	1	133	81	0	2	1	2
3	3	3	1	47	1	135	89	0	2	1	2
3	3	3	1	53	1	135	88	0	2	1	2
2	2	3	2	36	1	104	61	0	2	1	2
3	3	3	2	42	1	106	64	0	2	1	2
1	2	3	1	28	1	99	61	0	2	1	2
2	4	3	1	21	1	132	86	0	2	1	2
1	3	3	1	49	1	120	58	0	2	1	2
3	3	3	1	44	1	101	61	0	2	1	2
2	3	3	1	41	1	101	67	0	2	1	2
2	3	3	1	42	1	133	80	0	2	1	2
1	3	3	1	48	1	133	81	0	2	1	2
1	2	1	1	44	1	136	86	0	2	1	1
3	1	3	1	45	1	132	88	0	2	1	2
3	3	3	1	48	1	148	89	1	2	1	2
3	3	3	1	47	1	146	95	1	2	1	2
2	3	3	1	50	1	131	87	0	2	1	2
2	3	3	1	55	1	120	80	0	2	1	2
1	4	3	1	54	1	170	110	1	2	1	2
2	4	3	2	25	1	101	65	0	2	1	2
1	3	3	2	30	1	112	78	0	2	1	2
3	4	3	2	67	1	148	84	1	2	1	2
3	3	3	1	26	1	109	60	0	2	1	2
3	3	3	1	27	1	114	67	0	2	1	2
3	3	3	1	24	1	104	68	0	2	1	2
1	2	1	1	40	1	113	89	0	2	1	1
3	2	3	1	42	1	103	61	0	2	1	2
2	3	3	1	47	1	105	64	0	2	1	2
1	4	3	1	46	1	126	65	0	2	1	2
1	3	3	1	43	1	135	72	0	2	1	2
3	3	3	1	48	1	118	73	0	2	1	2
2	3	3	1	44	1	132	87	0	2	1	2
3	3	3	1	43	1	134	88	0	2	1	2
3	3	3	1	54	1	118	62	0	2	1	2
2	4	3	1	51	1	107	77	0	2	1	2
3	2	3	1	59	1	134	82	0	2	1	2
3	3	3	1	60	1	136	89	0	2	1	2
3	3	3	1	52	1	137	89	0	2	1	2
3	1	3	2	24	1	120	84	0	2	1	2
2	1	3	2	27	1	121	89	0	2	1	2
2	3	3	1	26	1	110	68	0	2	1	2
1	2	3	1	27	1	131	76	0	2	1	2
2	3	3	1	36	1	139	89	0	2	1	2
2	2	3	1	40	1	138	89	0	2	1	2
2	2	3	1	46	1	112	76	0	2	1	2
2	3	3	1	41	1	114	76	0	2	1	2
2	1	3	1	44	1	122	80	0	2	1	2
2	2	1	1	43	1	130	80	0	2	1	1
2	3	3	1	43	1	116	82	0	2	1	2
3	3	1	1	45	1	120	83	0	2	1	1
2	3	3	1	48	1	124	87	0	2	1	2
3	3	3	1	43	1	129	89	0	2	1	2
2	3	3	1	46	1	139	89	0	2	1	2
2	2	1	1	43	1	132	98	1	2	1	1
2	3	3	1	49	1	148	102	1	2	1	2
3	4	3	1	52	1	122	67	0	2	1	2
1	3	3	1	51	1	131	71	0	2	1	2
1	1	3	1	60	1	114	77	0	2	1	2
2	3	3	1	63	1	146	87	1	2	1	2
2	2	3	2	30	1	130	79	0	2	1	2
1	3	3	2	49	1	124	72	0	2	1	2
3	3	3	2	56	1	125	88	0	2	1	2
1	3	3	1	26	1	126	74	0	2	1	2
2	1	3	1	29	1	130	84	0	2	1	2
2	4	3	1	33	1	104	61	0	2	1	2
2	3	3	1	39	1	108	70	0	2	1	2
2	1	3	1	33	1	122	76	0	2	1	2
3	4	3	1	34	0	120	84	0	2	1	2
1	3	3	1	44	1	114	76	0	2	1	2
3	3	3	1	41	1	115	80	0	2	1	2
3	3	3	1	47	1	119	81	0	2	1	2
3	3	3	1	47	1	138	89	0	2	1	2
1	4	3	1	48	0	138	94	1	2	1	2
2	3	3	1	50	1	138	89	0	2	1	2
2	3	3	1	57	1	137	83	0	2	1	2
3	3	3	1	53	1	134	84	0	2	1	2
3	3	3	1	54	1	125	85	0	2	1	2
1	2	3	1	52	1	152	96	1	2	1	2
2	2	3	2	47	1	101	66	0	2	1	2
2	2	3	2	47	1	126	84	0	2	1	2
3	4	3	2	50	1	107	70	0	2	1	2
1	3	3	1	18	0	100	65	0	2	1	2
2	2	1	1	18	0	124	82	0	2	1	1
2	2	1	1	27	1	126	88	0	2	1	1
1	2	3	1	30	1	133	81	0	2	1	2
1	3	3	1	42	1	125	67	0	2	1	2
3	3	3	1	44	1	127	75	0	2	1	2
3	3	3	1	46	1	117	76	0	2	1	2
3	3	3	1	48	1	115	78	0	2	1	2
1	3	3	1	43	0	124	80	0	2	1	2
3	2	3	1	47	1	125	82	0	2	1	2
2	2	3	1	45	1	146	86	1	2	1	2
2	3	3	1	53	1	102	69	0	2	1	2
2	2	3	1	52	1	143	97	1	2	1	2
2	3	3	2	41	1	126	81	0	2	1	2
2	2	3	2	45	1	137	84	0	2	1	2
2	3	3	2	44	1	139	89	0	2	1	2
2	1	3	2	43	0	136	90	1	2	1	2
1	3	3	1	23	1	112	80	0	2	1	2
2	2	3	1	20	0	116	84	0	2	1	2
2	2	3	1	19	1	118	84	0	2	1	2
1	2	3	1	23	1	137	89	0	2	1	2
2	2	3	1	35	1	120	88	0	2	1	2
3	3	3	1	47	1	107	68	0	2	1	2
1	4	3	1	46	0	126	80	0	2	1	2
3	3	3	1	42	1	112	84	0	2	1	2
2	3	3	1	41	1	132	89	0	2	1	2
2	3	3	1	48	1	138	89	0	2	1	2
3	3	3	1	52	1	128	86	0	2	1	2
2	3	3	1	60	1	138	88	0	2	1	2
2	3	3	2	42	1	176	96	1	2	1	2
3	3	3	2	56	1	117	80	0	2	1	2
1	3	3	1	27	1	114	64	0	2	1	2
1	2	3	1	29	1	116	66	0	2	1	2
3	1	3	1	28	1	116	70	0	2	1	2
1	1	3	1	29	1	123	73	0	2	1	2
1	3	3	1	27	1	131	73	0	2	1	2
2	3	3	1	35	1	104	64	0	2	1	2
2	3	3	1	39	1	129	91	1	2	1	2
1	4	3	1	40	0	112	76	0	2	1	2
2	2	3	1	58	1	124	79	0	2	1	2
1	2	3	1	64	1	152	98	1	2	1	2
2	2	1	2	27	1	92	66	0	2	1	1
1	2	3	2	27	1	108	72	0	2	1	2
1	3	3	2	39	1	115	76	0	2	1	2
2	2	3	2	36	1	128	88	0	2	1	2
2	2	3	1	28	0	112	70	0	2	1	2
2	2	1	1	27	1	130	88	0	2	1	1
3	1	3	1	40	1	123	89	0	2	1	2
2	2	3	1	46	1	99	65	0	2	1	2
1	3	3	1	43	1	138	70	0	2	1	2
2	3	3	1	49	1	118	71	0	2	1	2
3	3	3	1	47	1	130	75	0	2	1	2
3	3	3	1	45	1	114	77	0	2	1	2
2	3	3	1	43	1	121	79	0	2	1	2
2	1	3	1	47	0	112	80	0	2	1	2
3	3	3	1	47	1	139	80	0	2	1	2
2	2	3	1	45	1	116	81	0	2	1	2
2	1	3	1	49	0	140	84	1	2	1	2
2	3	3	1	46	1	127	87	0	2	1	2
3	2	3	1	48	1	139	87	0	2	1	2
2	1	3	1	42	1	132	89	0	2	1	2
3	3	3	1	46	1	138	89	0	2	1	2
3	3	3	1	50	1	101	78	0	2	1	2
3	4	3	1	54	1	133	81	0	2	1	2
3	3	3	1	52	1	139	86	0	2	1	2
2	2	3	2	22	1	106	82	0	2	1	2
1	3	3	2	39	1	146	90	1	2	1	2
2	1	3	2	49	1	132	88	0	2	1	2
1	2	3	1	19	1	122	68	0	2	1	2
2	3	3	1	36	1	91	68	0	2	1	2
2	3	3	1	43	1	114	68	0	2	1	2
2	1	3	1	48	0	118	76	0	2	1	2
2	3	3	1	47	1	130	89	0	2	1	2
2	3	3	1	47	1	138	89	0	2	1	2
2	3	3	1	50	1	130	89	0	2	1	2
2	1	3	1	50	0	132	90	1	2	1	2
3	3	3	1	53	1	130	77	0	2	1	2
3	3	3	1	60	1	123	87	0	2	1	2
1	3	3	1	19	0	106	64	0	1	1	2
2	2	3	1	27	1	118	80	0	1	1	2
2	3	3	1	19	1	106	84	0	1	1	2
3	1	3	1	22	0	128	89	0	1	1	2
2	3	3	1	30	1	99	84	0	1	1	2
2	2	3	1	39	1	128	78	0	1	1	2
3	4	3	1	40	1	126	80	0	1	1	2
2	4	3	1	40	1	122	84	0	1	1	2
2	1	3	1	43	1	114	68	0	1	1	2
2	2	5	1	42	0	128	70	0	1	1	3
2	3	3	1	47	1	114	76	0	1	1	2
3	3	1	1	42	1	136	78	0	1	1	1
1	4	3	1	42	1	126	82	0	1	1	2
2	2	3	1	48	1	133	85	0	1	1	2
2	3	2	1	43	1	135	88	0	1	1	1
3	4	3	1	50	1	123	71	0	1	1	2
2	2	3	1	50	1	136	86	0	1	1	2
1	3	5	2	22	1	92	70	0	1	1	3
2	2	1	2	36	1	120	74	0	1	1	1
2	1	3	2	31	1	146	100	1	1	1	2
2	3	3	2	46	1	99	68	0	1	1	2
2	1	3	2	41	0	102	72	0	1	1	2
2	3	3	2	42	1	106	76	0	1	1	2
2	4	3	2	44	1	122	84	0	1	1	2
3	4	3	2	50	1	129	78	0	1	1	2
1	2	3	1	19	1	102	46	0	1	1	2
1	3	3	1	26	1	106	62	0	1	1	2
1	3	3	1	29	1	106	71	0	1	1	2
2	2	3	1	22	0	110	76	0	1	1	2
2	3	3	1	27	1	127	81	0	1	1	2
2	2	3	1	30	1	98	60	0	1	1	2
2	3	3	1	37	0	104	60	0	1	1	2
2	2	3	1	37	1	114	76	0	1	1	2
2	2	3	1	31	1	118	76	0	1	1	2
2	3	3	1	41	1	110	72	0	1	1	2
2	1	3	1	48	0	124	80	0	1	1	2
3	2	3	1	64	1	136	83	0	1	1	2
1	2	3	1	52	1	176	96	1	1	1	2
2	3	3	1	60	1	157	101	1	1	1	2
3	1	3	2	20	1	102	66	0	1	1	2
2	2	1	2	26	1	120	88	0	1	1	1
3	3	3	2	31	1	119	82	0	1	1	2
2	1	1	2	47	1	128	79	0	1	1	1
1	3	3	1	26	1	95	61	0	1	1	2
2	2	3	1	28	1	108	61	0	1	1	2
1	3	3	1	28	1	111	61	0	1	1	2
1	3	3	1	22	1	115	61	0	1	1	2
1	3	3	1	22	1	118	61	0	1	1	2
3	3	3	1	28	1	121	61	0	1	1	2
1	2	3	1	24	1	107	62	0	1	1	2
3	2	3	1	23	1	118	62	0	1	1	2
3	3	3	1	28	1	108	65	0	1	1	2
1	1	3	1	28	1	110	65	0	1	1	2
1	3	3	1	29	1	118	65	0	1	1	2
1	3	3	1	26	1	98	66	0	1	1	2
2	3	3	1	25	1	103	66	0	1	1	2
1	2	3	1	25	1	113	66	0	1	1	2
1	3	3	1	29	1	129	66	0	1	1	2
2	3	3	1	24	1	101	67	0	1	1	2
2	3	3	1	27	1	107	67	0	1	1	2
1	3	3	1	25	1	112	68	0	1	1	2
2	3	1	1	24	1	114	68	0	1	1	1
3	3	3	1	28	1	119	68	0	1	1	2
1	2	3	1	23	1	121	69	0	1	1	2
2	4	3	1	29	1	106	70	0	1	1	2
1	3	3	1	28	1	113	70	0	1	1	2
2	2	3	1	26	1	117	70	0	1	1	2
2	4	3	1	29	1	125	70	0	1	1	2
2	3	3	1	28	1	136	70	0	1	1	2
3	3	3	1	28	1	115	71	0	1	1	2
1	3	3	1	20	1	124	71	0	1	1	2
1	4	3	1	24	1	139	71	0	1	1	2
1	4	3	1	23	1	104	72	0	1	1	2
3	1	3	1	24	1	113	72	0	1	1	2
1	2	5	1	28	1	115	72	0	1	1	3
2	2	1	1	28	1	118	72	0	1	1	1
1	3	3	1	25	1	139	72	0	1	1	2
2	1	3	1	27	1	110	73	0	1	1	2
1	3	3	1	28	1	117	73	0	1	1	2
2	3	3	1	28	1	121	73	0	1	1	2
2	3	3	1	23	1	109	74	0	1	1	2
1	4	3	1	29	1	113	74	0	1	1	2
2	2	3	1	27	1	120	74	0	1	1	2
1	3	3	1	25	1	125	74	0	1	1	2
1	3	3	1	21	1	126	74	0	1	1	2
1	3	3	1	24	1	126	74	0	1	1	2
1	3	3	1	29	1	116	75	0	1	1	2
1	2	3	1	21	1	118	75	0	1	1	2
1	3	3	1	20	1	131	75	0	1	1	2
2	3	1	1	29	0	112	76	0	1	1	1
1	3	3	1	23	1	112	76	0	1	1	2
2	3	3	1	21	1	113	76	0	1	1	2
3	4	3	1	29	0	118	76	0	1	1	2
3	1	3	1	27	1	119	76	0	1	1	2
2	1	3	1	28	1	118	77	0	1	1	2
2	1	3	1	29	1	99	79	0	1	1	2
2	1	3	1	23	1	114	79	0	1	1	2
1	3	3	1	27	1	121	79	0	1	1	2
1	3	3	1	25	1	124	79	0	1	1	2
3	4	3	1	24	1	110	80	0	1	1	2
2	1	3	1	26	1	120	80	0	1	1	2
2	3	3	1	24	1	121	80	0	1	1	2
2	3	3	1	26	1	112	82	0	1	1	2
1	4	3	1	18	1	115	82	0	1	1	2
1	3	3	1	26	1	125	83	0	1	1	2
3	2	3	1	28	1	138	83	0	1	1	2
1	2	3	1	25	1	93	84	0	1	1	2
2	3	3	1	29	1	114	84	0	1	1	2
2	2	1	1	19	1	120	84	0	1	1	1
3	3	3	1	26	1	134	84	0	1	1	2
3	3	3	1	28	1	134	84	0	1	1	2
2	2	3	1	22	1	136	84	0	1	1	2
1	3	3	1	21	1	104	85	0	1	1	2
3	3	3	1	28	1	133	85	0	1	1	2
2	2	3	1	25	1	124	86	0	1	1	2
1	3	3	1	22	1	131	87	0	1	1	2
2	3	3	1	27	1	136	87	0	1	1	2
2	2	3	1	26	1	122	88	0	1	1	2
1	2	3	1	21	1	126	88	0	1	1	2
1	4	3	1	19	1	137	88	0	1	1	2
2	1	1	1	23	1	139	88	0	1	1	1
1	3	3	1	28	0	150	88	1	1	1	2
3	1	3	1	26	1	132	89	0	1	1	2
2	3	3	1	26	1	133	89	0	1	1	2
2	3	3	1	27	1	136	89	0	1	1	2
1	2	1	1	27	1	138	89	0	1	1	1
2	3	3	1	22	1	139	89	0	1	1	2
2	4	3	1	30	1	101	63	0	1	1	2
2	2	3	1	30	1	112	65	0	1	1	2
1	3	3	1	30	1	119	71	0	1	1	2
1	4	3	1	30	1	122	88	0	1	1	2
2	3	3	1	30	1	132	88	0	1	1	2
3	4	3	1	35	1	110	76	0	1	1	2
2	1	3	1	39	1	118	78	0	1	1	2
3	4	3	1	47	0	134	86	0	1	1	2
3	4	3	1	46	1	144	98	1	1	1	2
2	4	3	1	54	1	148	97	1	1	1	2
3	3	3	2	26	1	103	61	0	1	1	2
3	1	3	2	26	1	113	66	0	1	1	2
1	2	3	2	29	0	108	68	0	1	1	2
2	2	3	2	27	1	107	71	0	1	1	2
2	1	3	2	19	1	109	71	0	1	1	2
3	1	3	2	26	0	108	74	0	1	1	2
3	3	3	2	28	1	114	75	0	1	1	2
2	3	1	2	25	0	106	76	0	1	1	1
2	2	3	2	25	1	123	78	0	1	1	2
3	2	3	2	28	1	112	79	0	1	1	2
1	3	3	2	28	1	112	80	0	1	1	2
2	3	3	2	28	1	118	80	0	1	1	2
2	2	1	2	21	1	120	80	0	1	1	1
1	2	3	2	23	1	124	86	0	1	1	2
1	3	3	2	27	1	132	88	0	1	1	2
2	2	3	2	30	1	94	72	0	1	1	2
2	3	3	2	30	1	113	74	0	1	1	2
1	3	3	2	30	1	112	78	0	1	1	2
1	2	3	2	34	1	106	63	0	1	1	2
3	4	3	2	34	0	116	80	0	1	1	2
2	2	3	2	34	1	118	81	0	1	1	2
1	3	3	2	35	1	108	84	0	1	1	2
1	2	3	2	35	1	116	88	0	1	1	2
1	4	3	2	53	1	126	63	0	1	1	2
1	2	3	1	27	1	106	61	0	1	1	2
1	3	3	1	24	1	108	61	0	1	1	2
2	3	3	1	29	1	110	61	0	1	1	2
1	3	3	1	23	1	111	61	0	1	1	2
2	2	3	1	29	1	113	61	0	1	1	2
1	2	3	1	21	1	116	61	0	1	1	2
2	1	3	1	27	1	92	62	0	1	1	2
3	1	3	1	23	1	100	62	0	1	1	2
1	1	3	1	27	1	105	62	0	1	1	2
1	3	3	1	28	1	111	62	0	1	1	2
3	2	3	1	25	1	115	62	0	1	1	2
2	2	3	1	22	1	125	62	0	1	1	2
1	3	3	1	29	1	101	63	0	1	1	2
3	1	3	1	26	1	103	63	0	1	1	2
1	1	3	1	27	1	98	64	0	1	1	2
1	3	3	1	23	1	119	64	0	1	1	2
2	1	3	1	26	1	120	64	0	1	1	2
1	1	3	1	26	1	134	64	0	1	1	2
1	3	3	1	25	1	99	65	0	1	1	2
1	3	3	1	19	1	113	65	0	1	1	2
2	2	3	1	21	0	100	66	0	1	1	2
1	2	3	1	22	1	104	66	0	1	1	2
3	3	3	1	28	1	110	66	0	1	1	2
1	3	3	1	22	1	113	66	0	1	1	2
1	3	3	1	28	1	120	66	0	1	1	2
2	1	3	1	21	1	103	67	0	1	1	2
1	1	3	1	23	1	108	67	0	1	1	2
2	2	3	1	24	1	131	67	0	1	1	2
1	2	3	1	26	1	105	68	0	1	1	2
2	1	3	1	28	1	108	68	0	1	1	2
2	3	3	1	29	1	117	68	0	1	1	2
3	2	3	1	26	1	122	68	0	1	1	2
3	3	3	1	27	1	109	69	0	1	1	2
1	3	3	1	23	1	103	70	0	1	1	2
3	1	3	1	27	1	112	70	0	1	1	2
1	4	3	1	22	1	114	70	0	1	1	2
3	3	3	1	23	1	118	70	0	1	1	2
2	2	3	1	28	1	122	70	0	1	1	2
3	1	3	1	23	1	105	71	0	1	1	2
3	3	3	1	28	1	106	71	0	1	1	2
1	4	3	1	20	1	111	71	0	1	1	2
2	3	3	1	27	1	125	71	0	1	1	2
2	2	3	1	25	1	108	72	0	1	1	2
2	3	3	1	25	1	109	72	0	1	1	2
2	2	3	1	24	1	111	72	0	1	1	2
2	3	3	1	29	1	111	72	0	1	1	2
3	3	3	1	22	1	114	74	0	1	1	2
1	2	3	1	29	1	117	74	0	1	1	2
1	3	3	1	24	1	124	74	0	1	1	2
2	1	3	1	25	1	138	74	0	1	1	2
1	1	1	1	24	1	103	75	0	1	1	1
2	2	3	1	23	1	108	75	0	1	1	2
1	1	1	1	25	1	110	75	0	1	1	1
1	3	3	1	24	1	114	75	0	1	1	2
1	3	3	1	26	1	125	75	0	1	1	2
3	3	3	1	26	1	103	76	0	1	1	2
2	3	3	1	26	1	109	76	0	1	1	2
3	1	3	1	24	1	114	76	0	1	1	2
1	3	1	1	23	1	117	76	0	1	1	1
3	4	3	1	25	0	118	76	0	1	1	2
2	2	1	1	22	1	119	76	0	1	1	1
3	3	3	1	25	1	130	76	0	1	1	2
2	3	3	1	29	1	114	77	0	1	1	2
2	1	3	1	20	1	117	77	0	1	1	2
1	1	3	1	25	1	122	77	0	1	1	2
2	2	3	1	21	1	124	77	0	1	1	2
2	1	3	1	25	1	116	79	0	1	1	2
3	4	3	1	22	1	123	79	0	1	1	2
1	3	3	1	28	1	129	79	0	1	1	2
2	2	3	1	27	1	111	80	0	1	1	2
3	1	3	1	23	1	113	80	0	1	1	2
3	4	3	1	23	0	118	80	0	1	1	2
3	1	3	1	25	1	125	80	0	1	1	2
3	1	3	1	25	1	119	81	0	1	1	2
2	3	3	1	23	1	126	81	0	1	1	2
2	2	1	1	29	1	131	81	0	1	1	1
2	1	3	1	29	1	139	81	0	1	1	2
2	2	3	1	25	1	110	82	0	1	1	2
3	3	3	1	23	1	123	82	0	1	1	2
2	1	3	1	28	1	131	82	0	1	1	2
2	3	3	1	27	1	132	82	0	1	1	2
2	3	3	1	21	1	117	83	0	1	1	2
2	3	3	1	24	1	128	83	0	1	1	2
3	3	1	1	28	1	130	83	0	1	1	1
2	3	3	1	25	1	130	83	0	1	1	2
2	3	3	1	27	1	137	83	0	1	1	2
2	3	3	1	24	1	119	84	0	1	1	2
3	3	3	1	29	1	120	84	0	1	1	2
3	1	3	1	26	1	121	84	0	1	1	2
2	1	3	1	28	1	127	84	0	1	1	2
3	3	3	1	25	1	128	84	0	1	1	2
1	2	3	1	26	1	130	84	0	1	1	2
2	2	1	1	24	1	137	84	0	1	1	1
2	2	3	1	23	1	122	85	0	1	1	2
2	3	3	1	28	1	127	85	0	1	1	2
3	4	3	1	23	1	139	85	0	1	1	2
1	2	3	1	21	1	122	87	0	1	1	2
2	2	3	1	26	1	126	87	0	1	1	2
2	2	3	1	24	1	120	88	0	1	1	2
2	3	3	1	20	1	125	88	0	1	1	2
3	2	3	1	27	1	138	88	0	1	1	2
1	3	3	1	18	1	117	89	0	1	1	2
2	3	3	1	28	1	125	89	0	1	1	2
3	1	3	1	24	0	126	89	0	1	1	2
1	4	3	1	21	1	127	89	0	1	1	2
2	2	3	1	26	1	130	89	0	1	1	2
2	1	3	1	27	1	131	89	0	1	1	2
1	4	3	1	23	1	131	89	0	1	1	2
2	3	3	1	23	1	135	89	0	1	1	2
2	2	3	1	22	1	146	90	1	1	1	2
2	3	3	1	26	1	156	98	1	1	1	2
3	4	3	1	30	1	111	71	0	1	1	2
1	3	3	1	30	1	112	71	0	1	1	2
3	3	3	1	30	1	117	71	0	1	1	2
3	1	3	1	30	1	109	75	0	1	1	2
3	2	3	1	30	1	122	84	0	1	1	2
3	3	3	1	30	1	125	86	0	1	1	2
2	1	3	1	30	0	126	88	0	1	1	2
2	4	3	1	33	1	106	68	0	1	1	2
1	3	3	1	37	1	130	71	0	1	1	2
3	1	3	1	39	1	125	72	0	1	1	2
1	3	3	1	32	1	124	76	0	1	1	2
2	3	3	1	39	1	127	82	0	1	1	2
3	4	3	1	38	1	119	83	0	1	1	2
2	2	1	1	32	1	116	90	1	1	1	1
2	4	3	1	40	1	138	89	0	1	1	2
2	4	3	1	48	1	135	84	0	1	1	2
3	1	3	2	29	1	93	61	0	1	1	2
2	2	3	2	29	1	95	62	0	1	1	2
2	3	3	2	29	1	100	63	0	1	1	2
2	3	3	2	29	1	99	64	0	1	1	2
3	3	3	2	21	1	103	67	0	1	1	2
1	1	1	2	19	1	105	67	0	1	1	1
2	3	3	2	23	1	116	68	0	1	1	2
3	3	3	2	18	1	105	70	0	1	1	2
3	1	3	2	29	1	105	70	0	1	1	2
2	1	3	2	26	1	109	71	0	1	1	2
2	2	3	2	28	1	111	71	0	1	1	2
3	1	3	2	26	1	113	72	0	1	1	2
3	1	3	2	24	1	112	74	0	1	1	2
3	3	3	2	29	1	113	78	0	1	1	2
3	2	3	2	25	1	111	80	0	1	1	2
3	1	3	2	29	1	112	80	0	1	1	2
2	3	3	2	18	1	135	80	0	1	1	2
2	3	3	2	25	1	125	82	0	1	1	2
2	3	3	2	29	1	106	85	0	1	1	2
3	1	3	2	27	1	116	85	0	1	1	2
2	3	3	2	29	1	129	87	0	1	1	2
2	3	3	2	19	1	131	87	0	1	1	2
2	1	3	2	26	1	127	88	0	1	1	2
2	2	3	2	28	1	128	88	0	1	1	2
2	3	3	2	30	1	107	79	0	1	1	2
2	1	3	2	30	1	122	82	0	1	1	2
2	3	3	2	34	1	94	61	0	1	1	2
2	2	3	2	38	1	101	62	0	1	1	2
2	2	3	2	34	1	98	63	0	1	1	2
1	4	3	2	32	1	102	63	0	1	1	2
2	2	3	2	32	1	103	69	0	1	1	2
2	3	3	2	34	1	114	75	0	1	1	2
3	3	3	2	36	1	119	75	0	1	1	2
1	3	3	2	38	1	113	76	0	1	1	2
1	3	3	2	40	1	99	66	0	1	1	2
1	3	3	2	45	1	92	68	0	1	1	2
1	3	5	2	42	1	106	70	0	1	1	3
2	1	3	2	45	0	114	72	0	1	1	2
3	1	3	2	42	1	138	89	0	1	1	2
2	2	3	1	23	1	101	60	0	1	1	2
2	2	3	1	28	0	102	60	0	1	1	2
2	2	3	1	19	1	130	60	0	1	1	2
3	1	3	1	24	1	98	61	0	1	1	2
2	1	3	1	21	1	102	61	0	1	1	2
1	3	3	1	23	1	108	61	0	1	1	2
2	2	3	1	27	1	92	62	0	1	1	2
1	2	3	1	22	1	94	62	0	1	1	2
3	3	3	1	24	1	96	62	0	1	1	2
2	3	3	1	23	1	105	62	0	1	1	2
3	1	3	1	24	1	107	62	0	1	1	2
1	2	3	1	20	1	118	62	0	1	1	2
2	4	3	1	25	1	119	62	0	1	1	2
1	1	3	1	28	1	120	62	0	1	1	2
3	1	3	1	26	1	117	63	0	1	1	2
1	2	3	1	22	1	123	63	0	1	1	2
2	3	3	1	25	1	109	65	0	1	1	2
3	3	3	1	29	1	123	66	0	1	1	2
2	1	3	1	26	1	99	67	0	1	1	2
2	3	3	1	22	1	104	68	0	1	1	2
2	1	3	1	22	1	115	68	0	1	1	2
2	1	3	1	27	1	100	69	0	1	1	2
1	2	3	1	29	1	108	69	0	1	1	2
2	3	3	1	20	1	115	69	0	1	1	2
1	2	3	1	28	1	118	69	0	1	1	2
3	3	3	1	26	1	114	70	0	1	1	2
2	2	3	1	20	1	114	70	0	1	1	2
1	2	3	1	27	1	114	70	0	1	1	2
2	2	1	1	19	1	98	71	0	1	1	1
2	1	3	1	26	1	108	71	0	1	1	2
3	3	3	1	23	1	123	71	0	1	1	2
2	3	3	1	27	1	104	72	0	1	1	2
2	1	3	1	24	1	113	72	0	1	1	2
2	3	3	1	29	1	121	72	0	1	1	2
3	1	3	1	22	1	125	72	0	1	1	2
1	3	3	1	19	1	127	72	0	1	1	2
2	2	3	1	29	1	107	73	0	1	1	2
2	3	3	1	27	1	109	73	0	1	1	2
3	2	3	1	24	1	120	73	0	1	1	2
3	1	3	1	21	0	124	73	0	1	1	2
3	3	3	1	26	1	126	73	0	1	1	2
3	3	3	1	22	1	107	74	0	1	1	2
1	3	3	1	24	1	110	74	0	1	1	2
2	3	3	1	18	1	113	74	0	1	1	2
1	2	1	1	27	1	113	74	0	1	1	1
1	3	3	1	20	1	116	74	0	1	1	2
2	1	3	1	27	1	105	75	0	1	1	2
2	3	3	1	23	1	106	75	0	1	1	2
2	1	3	1	24	1	110	75	0	1	1	2
2	1	3	1	26	1	112	75	0	1	1	2
2	2	3	1	28	1	116	75	0	1	1	2
3	3	3	1	26	1	132	75	0	1	1	2
2	1	3	1	27	1	107	76	0	1	1	2
2	1	3	1	29	1	112	76	0	1	1	2
2	3	3	1	18	1	117	76	0	1	1	2
2	3	3	1	24	1	119	76	0	1	1	2
3	1	3	1	24	1	121	76	0	1	1	2
2	2	3	1	24	1	104	77	0	1	1	2
2	2	3	1	27	1	110	77	0	1	1	2
3	2	3	1	24	1	117	77	0	1	1	2
3	3	2	1	25	1	120	77	0	1	1	1
2	2	3	1	23	1	130	77	0	1	1	2
2	3	3	1	27	1	112	78	0	1	1	2
1	4	3	1	20	1	118	78	0	1	1	2
3	1	3	1	22	1	108	79	0	1	1	2
2	1	3	1	29	1	109	79	0	1	1	2
2	1	3	1	28	1	115	79	0	1	1	2
3	1	3	1	26	1	118	79	0	1	1	2
2	1	1	1	24	1	118	79	0	1	1	1
2	2	3	1	19	1	118	79	0	1	1	2
1	4	3	1	28	1	119	79	0	1	1	2
1	3	3	1	20	1	126	79	0	1	1	2
2	1	3	1	21	1	135	79	0	1	1	2
1	2	3	1	29	1	116	80	0	1	1	2
3	1	3	1	19	1	118	80	0	1	1	2
3	3	3	1	26	1	122	80	0	1	1	2
3	3	3	1	26	1	129	80	0	1	1	2
2	3	3	1	21	1	120	81	0	1	1	2
2	1	3	1	21	1	121	81	0	1	1	2
2	2	1	1	24	1	127	81	0	1	1	1
3	4	3	1	25	1	117	82	0	1	1	2
3	3	3	1	25	1	125	82	0	1	1	2
1	3	3	1	24	1	130	82	0	1	1	2
3	3	3	1	22	1	132	82	0	1	1	2
2	2	3	1	22	1	121	83	0	1	1	2
3	3	3	1	22	1	124	83	0	1	1	2
2	3	3	1	27	1	126	83	0	1	1	2
3	3	3	1	20	1	138	83	0	1	1	2
2	3	3	1	25	1	118	84	0	1	1	2
3	2	3	1	29	1	127	84	0	1	1	2
1	3	3	1	25	1	135	84	0	1	1	2
2	2	3	1	27	1	126	85	0	1	1	2
2	2	3	1	27	1	130	85	0	1	1	2
3	3	3	1	29	1	133	85	0	1	1	2
2	1	1	1	27	1	135	85	0	1	1	1
2	2	3	1	24	1	138	85	0	1	1	2
3	1	3	1	24	1	112	86	0	1	1	2
3	2	3	1	27	1	113	86	0	1	1	2
3	3	3	1	23	1	121	86	0	1	1	2
3	2	3	1	24	1	123	86	0	1	1	2
2	2	3	1	27	1	125	86	0	1	1	2
2	1	3	1	22	1	128	86	0	1	1	2
2	3	3	1	17	1	133	87	0	1	1	2
2	3	3	1	27	1	138	87	0	1	1	2
3	2	3	1	28	1	119	88	0	1	1	2
2	2	3	1	25	1	122	88	0	1	1	2
1	3	3	1	29	1	133	88	0	1	1	2
1	4	3	1	18	1	133	88	0	1	1	2
3	2	3	1	29	1	117	89	0	1	1	2
3	4	3	1	28	1	121	89	0	1	1	2
3	1	3	1	23	1	133	89	0	1	1	2
3	3	3	1	21	1	135	89	0	1	1	2
2	3	3	1	27	1	135	89	0	1	1	2
3	1	3	1	27	1	135	89	0	1	1	2
3	4	3	1	28	1	139	89	0	1	1	2
1	2	3	1	28	0	148	90	1	1	1	2
3	4	3	1	29	1	141	95	1	1	1	2
2	2	3	1	30	1	112	71	0	1	1	2
2	2	3	1	30	1	112	72	0	1	1	2
3	2	3	1	30	1	130	81	0	1	1	2
3	2	3	1	30	1	112	82	0	1	1	2
3	2	3	1	34	1	91	61	0	1	1	2
1	2	3	1	31	1	127	61	0	1	1	2
1	3	3	1	36	1	101	62	0	1	1	2
1	3	3	1	36	1	104	62	0	1	1	2
3	3	3	1	35	1	98	67	0	1	1	2
2	3	3	1	33	1	116	72	0	1	1	2
2	1	3	1	31	1	120	72	0	1	1	2
1	3	3	1	33	1	116	73	0	1	1	2
3	3	3	1	38	1	128	73	0	1	1	2
3	3	3	1	35	1	115	76	0	1	1	2
1	3	3	1	36	1	124	76	0	1	1	2
1	4	3	1	34	1	126	76	0	1	1	2
3	1	3	1	31	1	127	77	0	1	1	2
2	2	3	1	39	1	115	78	0	1	1	2
1	3	1	1	38	1	116	78	0	1	1	1
3	3	3	1	35	1	124	78	0	1	1	2
1	3	3	1	37	1	128	81	0	1	1	2
1	4	3	1	38	1	117	82	0	1	1	2
1	1	3	1	39	1	130	82	0	1	1	2
1	3	3	1	35	1	130	82	0	1	1	2
3	3	3	1	31	1	128	86	0	1	1	2
2	2	3	1	34	1	130	86	0	1	1	2
3	4	3	1	31	1	139	88	0	1	1	2
1	3	3	1	36	1	115	89	0	1	1	2
3	4	3	1	34	1	129	89	0	1	1	2
2	2	3	1	35	1	132	89	0	1	1	2
3	4	3	1	36	1	138	89	0	1	1	2
2	3	3	1	39	0	154	116	1	1	1	2
2	3	3	1	44	0	110	84	0	1	1	2
1	3	5	1	42	1	138	92	1	1	1	3
1	3	5	1	42	1	138	92	1	1	1	3
2	3	3	1	52	1	96	65	0	1	1	2
3	3	3	1	53	1	110	72	0	1	1	2
1	4	3	1	51	1	130	74	0	1	1	2
1	3	3	1	52	1	134	76	0	1	1	2
1	1	3	1	51	1	135	83	0	1	1	2
2	3	3	1	52	1	126	86	0	1	1	2
3	1	3	2	22	1	94	63	0	1	1	2
2	1	3	2	27	1	100	63	0	1	1	2
2	2	3	2	20	1	109	64	0	1	1	2
3	1	3	2	25	1	103	66	0	1	1	2
2	2	3	2	21	1	114	66	0	1	1	2
1	3	3	2	24	1	99	67	0	1	1	2
2	2	3	2	25	1	111	70	0	1	1	2
3	1	3	2	23	1	101	71	0	1	1	2
2	3	3	2	26	1	113	72	0	1	1	2
2	1	1	2	29	1	111	73	0	1	1	1
3	1	3	2	28	1	111	73	0	1	1	2
1	3	3	2	26	1	96	74	0	1	1	2
3	3	3	2	22	1	109	74	0	1	1	2
2	1	3	2	25	1	114	74	0	1	1	2
3	3	3	2	21	1	115	74	0	1	1	2
2	2	1	2	21	1	100	76	0	1	1	1
2	2	3	2	22	1	110	76	0	1	1	2
2	1	3	2	28	1	117	76	0	1	1	2
2	2	3	2	27	1	109	77	0	1	1	2
3	3	3	2	26	1	110	77	0	1	1	2
3	1	3	2	29	1	112	77	0	1	1	2
2	1	3	2	22	1	114	78	0	1	1	2
1	3	3	2	25	1	110	80	0	1	1	2
3	1	3	2	21	1	118	81	0	1	1	2
3	3	3	2	27	1	122	81	0	1	1	2
2	2	3	2	26	0	112	82	0	1	1	2
2	3	3	2	30	1	100	66	0	1	1	2
3	3	3	2	30	1	131	75	0	1	1	2
1	2	3	2	30	1	110	76	0	1	1	2
3	2	3	2	30	1	115	77	0	1	1	2
2	2	3	2	34	1	97	61	0	1	1	2
1	3	3	2	32	1	102	63	0	1	1	2
1	2	3	2	37	1	107	63	0	1	1	2
1	3	5	2	37	1	116	64	0	1	1	3
2	3	3	2	31	1	114	66	0	1	1	2
1	4	3	2	38	1	105	71	0	1	1	2
2	2	1	2	31	1	120	72	0	1	1	1
2	1	3	2	36	1	107	73	0	1	1	2
2	3	3	2	32	1	109	75	0	1	1	2
2	1	3	2	36	1	113	75	0	1	1	2
2	2	3	2	38	1	120	78	0	1	1	2
2	4	3	2	33	1	134	80	0	1	1	2
2	2	1	2	31	1	114	84	0	1	1	1
3	2	3	2	35	1	137	85	0	1	1	2
3	3	1	2	43	1	112	74	0	1	1	1
3	1	3	1	27	1	112	60	0	1	1	2
3	2	3	1	27	1	98	61	0	1	1	2
3	3	1	1	22	1	113	61	0	1	1	1
1	2	3	1	19	1	122	61	0	1	1	2
2	2	1	1	24	1	126	61	0	1	1	1
1	3	3	1	20	1	130	61	0	1	1	2
2	3	3	1	26	1	93	62	0	1	1	2
2	1	3	1	27	1	95	62	0	1	1	2
2	2	3	1	19	1	104	62	0	1	1	2
2	3	3	1	27	1	112	63	0	1	1	2
1	3	3	1	21	1	98	64	0	1	1	2
2	3	3	1	25	1	101	64	0	1	1	2
1	2	3	1	28	0	108	64	0	1	1	2
2	2	3	1	29	1	108	64	0	1	1	2
1	4	3	1	20	1	97	65	0	1	1	2
2	1	3	1	18	1	101	65	0	1	1	2
2	3	3	1	29	1	104	65	0	1	1	2
2	2	3	1	27	1	107	65	0	1	1	2
3	1	3	1	27	0	112	65	0	1	1	2
3	3	3	1	24	1	114	65	0	1	1	2
2	3	3	1	28	1	117	65	0	1	1	2
3	3	3	1	18	1	122	65	0	1	1	2
3	1	3	1	27	1	122	65	0	1	1	2
2	2	1	1	29	1	102	66	0	1	1	1
2	2	3	1	21	1	138	66	0	1	1	2
3	2	3	1	25	1	90	67	0	1	1	2
3	1	3	1	24	1	101	67	0	1	1	2
1	4	3	1	29	1	106	67	0	1	1	2
3	3	3	1	27	1	110	67	0	1	1	2
2	4	3	1	27	1	114	67	0	1	1	2
2	3	3	1	18	1	115	67	0	1	1	2
3	1	3	1	19	1	130	67	0	1	1	2
2	3	3	1	22	1	100	68	0	1	1	2
2	3	3	1	22	1	102	68	0	1	1	2
2	3	3	1	28	1	106	68	0	1	1	2
2	1	3	1	25	1	108	68	0	1	1	2
3	3	3	1	23	1	109	68	0	1	1	2
3	1	3	1	25	1	126	68	0	1	1	2
2	2	1	1	27	0	102	69	0	1	1	1
3	3	3	1	23	1	105	69	0	1	1	2
2	4	3	1	18	1	109	69	0	1	1	2
2	1	3	1	22	1	110	69	0	1	1	2
3	1	3	1	22	1	113	69	0	1	1	2
3	3	3	1	27	1	112	70	0	1	1	2
1	3	3	1	18	1	114	70	0	1	1	2
1	3	3	1	27	1	120	70	0	1	1	2
3	4	3	1	29	1	107	71	0	1	1	2
2	2	3	1	24	1	107	71	0	1	1	2
2	1	3	1	20	1	99	72	0	1	1	2
2	1	3	1	23	1	105	72	0	1	1	2
2	3	3	1	29	1	105	72	0	1	1	2
2	2	3	1	23	1	106	72	0	1	1	2
3	2	3	1	28	1	107	72	0	1	1	2
3	4	3	1	22	1	110	72	0	1	1	2
3	1	3	1	24	1	111	72	0	1	1	2
3	1	3	1	26	1	114	72	0	1	1	2
1	2	3	1	27	1	118	72	0	1	1	2
3	1	3	1	26	1	118	72	0	1	1	2
3	3	3	1	24	1	119	72	0	1	1	2
1	2	3	1	25	1	121	72	0	1	1	2
3	1	3	1	19	1	109	73	0	1	1	2
3	1	3	1	27	1	112	73	0	1	1	2
3	3	3	1	27	1	113	73	0	1	1	2
1	2	3	1	23	1	116	73	0	1	1	2
3	4	3	1	23	1	120	73	0	1	1	2
2	2	3	1	20	1	110	74	0	1	1	2
1	2	3	1	22	1	113	74	0	1	1	2
3	1	3	1	21	1	113	74	0	1	1	2
1	3	3	1	24	1	115	74	0	1	1	2
3	4	3	1	23	1	116	74	0	1	1	2
2	2	3	1	24	1	116	74	0	1	1	2
3	4	3	1	27	1	118	74	0	1	1	2
3	3	3	1	21	1	125	74	0	1	1	2
2	3	3	1	22	1	133	74	0	1	1	2
2	2	3	1	20	1	133	74	0	1	1	2
2	1	3	1	29	1	105	75	0	1	1	2
3	2	3	1	21	1	107	75	0	1	1	2
2	1	3	1	27	1	109	75	0	1	1	2
2	2	3	1	24	1	110	75	0	1	1	2
2	3	3	1	27	1	114	75	0	1	1	2
3	3	3	1	25	1	116	75	0	1	1	2
2	3	3	1	25	1	117	75	0	1	1	2
1	3	3	1	20	1	119	75	0	1	1	2
2	3	3	1	19	1	121	75	0	1	1	2
1	3	3	1	27	1	123	75	0	1	1	2
3	2	3	1	20	1	127	75	0	1	1	2
2	4	3	1	21	1	110	76	0	1	1	2
1	3	3	1	20	1	110	76	0	1	1	2
2	2	3	1	23	1	112	76	0	1	1	2
2	3	3	1	21	1	114	76	0	1	1	2
2	1	3	1	23	1	119	76	0	1	1	2
2	2	3	1	20	1	121	76	0	1	1	2
1	3	3	1	29	1	128	76	0	1	1	2
2	2	3	1	20	1	110	77	0	1	1	2
2	3	3	1	29	1	112	77	0	1	1	2
2	1	3	1	25	1	117	77	0	1	1	2
2	1	3	1	27	1	119	77	0	1	1	2
3	3	3	1	29	1	132	77	0	1	1	2
3	3	3	1	23	1	139	77	0	1	1	2
1	3	3	1	19	1	98	78	0	1	1	2
2	1	3	1	24	1	111	78	0	1	1	2
2	3	3	1	26	1	117	78	0	1	1	2
1	4	2	1	26	1	120	78	0	1	1	1
1	1	3	1	27	1	122	78	0	1	1	2
2	1	3	1	29	1	123	78	0	1	1	2
2	3	3	1	26	1	123	78	0	1	1	2
2	3	3	1	26	1	125	78	0	1	1	2
3	1	3	1	27	1	125	78	0	1	1	2
3	3	3	1	27	1	133	78	0	1	1	2
1	3	3	1	23	1	119	79	0	1	1	2
2	1	3	1	29	1	120	79	0	1	1	2
2	1	1	1	28	1	123	79	0	1	1	1
1	1	3	1	26	1	126	79	0	1	1	2
1	2	1	1	23	1	127	79	0	1	1	1
1	4	3	1	19	1	131	79	0	1	1	2
1	2	3	1	21	1	134	79	0	1	1	2
3	2	3	1	19	1	114	80	0	1	1	2
2	1	3	1	21	1	119	80	0	1	1	2
3	3	3	1	20	1	120	80	0	1	1	2
2	3	3	1	18	1	120	80	0	1	1	2
3	3	3	1	24	1	122	80	0	1	1	2
2	2	1	1	21	1	124	80	0	1	1	1
2	3	3	1	20	1	126	80	0	1	1	2
2	3	3	1	28	1	126	80	0	1	1	2
3	1	3	1	21	0	128	80	0	1	1	2
2	1	3	1	28	1	111	81	0	1	1	2
3	1	3	1	24	1	119	81	0	1	1	2
2	1	3	1	26	1	120	81	0	1	1	2
1	4	3	1	20	1	123	81	0	1	1	2
1	3	3	1	29	1	126	81	0	1	1	2
2	3	3	1	25	1	128	81	0	1	1	2
3	2	3	1	29	1	134	81	0	1	1	2
1	2	3	1	26	1	106	82	0	1	1	2
2	2	1	1	23	0	109	82	0	1	1	1
2	1	3	1	24	1	111	82	0	1	1	2
1	3	3	1	18	1	114	82	0	1	1	2
3	1	3	1	24	1	117	82	0	1	1	2
3	3	3	1	29	1	120	82	0	1	1	2
3	3	3	1	22	1	120	82	0	1	1	2
1	3	3	1	29	1	121	82	0	1	1	2
3	4	3	1	26	1	124	82	0	1	1	2
1	3	3	1	23	1	125	82	0	1	1	2
3	1	3	1	28	0	125	82	0	1	1	2
2	2	3	1	26	1	130	82	0	1	1	2
1	1	3	1	22	1	134	82	0	1	1	2
1	1	3	1	24	1	139	82	0	1	1	2
2	2	3	1	26	1	139	82	0	1	1	2
2	1	3	1	20	1	122	83	0	1	1	2
3	1	3	1	24	1	128	83	0	1	1	2
3	3	3	1	20	1	135	83	0	1	1	2
3	3	3	1	23	1	136	83	0	1	1	2
3	1	3	1	24	1	115	84	0	1	1	2
3	1	3	1	28	1	116	84	0	1	1	2
1	1	3	1	27	1	120	84	0	1	1	2
1	2	3	1	23	1	121	84	0	1	1	2
2	2	3	1	26	1	122	84	0	1	1	2
1	3	3	1	28	1	122	84	0	1	1	2
3	2	3	1	26	1	124	84	0	1	1	2
2	2	3	1	26	1	124	84	0	1	1	2
2	3	3	1	27	1	134	84	0	1	1	2
3	3	3	1	20	1	118	85	0	1	1	2
2	3	3	1	29	1	120	85	0	1	1	2
3	3	3	1	29	1	124	85	0	1	1	2
3	3	3	1	23	1	127	85	0	1	1	2
3	1	3	1	25	1	131	85	0	1	1	2
2	1	3	1	29	1	138	85	0	1	1	2
2	3	3	1	23	1	92	86	0	1	1	2
2	3	3	1	24	1	121	86	0	1	1	2
3	1	3	1	27	1	123	86	0	1	1	2
1	4	3	1	21	1	126	86	0	1	1	2
3	1	3	1	27	1	128	86	0	1	1	2
2	2	3	1	22	1	130	86	0	1	1	2
2	1	3	1	29	1	131	86	0	1	1	2
1	3	3	1	27	1	137	86	0	1	1	2
3	1	3	1	20	1	117	87	0	1	1	2
2	1	3	1	28	1	121	87	0	1	1	2
1	1	3	1	28	1	125	87	0	1	1	2
2	2	1	1	18	1	126	87	0	1	1	1
1	2	3	1	29	1	129	87	0	1	1	2
2	3	3	1	22	1	130	87	0	1	1	2
2	1	3	1	24	1	130	87	0	1	1	2
2	3	3	1	29	1	132	87	0	1	1	2
2	3	3	1	27	1	132	87	0	1	1	2
2	3	3	1	27	1	137	87	0	1	1	2
3	1	3	1	23	1	137	87	0	1	1	2
3	1	3	1	27	1	130	88	0	1	1	2
2	4	3	1	29	1	130	88	0	1	1	2
2	3	3	1	28	1	134	88	0	1	1	2
2	1	3	1	23	1	126	89	0	1	1	2
2	3	3	1	23	1	127	89	0	1	1	2
2	3	3	1	27	1	128	89	0	1	1	2
3	3	3	1	29	1	131	89	0	1	1	2
2	2	3	1	29	1	132	89	0	1	1	2
2	2	3	1	25	1	133	89	0	1	1	2
2	1	1	1	21	1	134	89	0	1	1	1
2	3	3	1	27	1	136	89	0	1	1	2
2	2	1	1	27	1	138	89	0	1	1	1
3	1	3	1	27	1	138	89	0	1	1	2
2	3	3	1	28	1	139	89	0	1	1	2
2	2	3	1	21	1	139	89	0	1	1	2
2	3	3	1	21	1	139	89	0	1	1	2
2	2	3	1	21	1	139	89	0	1	1	2
1	2	1	1	29	1	139	89	0	1	1	1
1	3	3	1	18	1	160	90	1	1	1	2
2	2	3	1	24	1	164	108	1	1	1	2
2	3	3	1	30	1	110	61	0	1	1	2
2	2	3	1	30	1	98	67	0	1	1	2
3	3	3	1	30	1	107	69	0	1	1	2
1	3	3	1	30	1	106	72	0	1	1	2
1	2	3	1	30	1	107	73	0	1	1	2
3	2	3	1	30	1	119	73	0	1	1	2
2	2	3	1	30	1	110	76	0	1	1	2
3	3	3	1	30	1	106	77	0	1	1	2
2	2	3	1	30	1	113	78	0	1	1	2
1	1	3	1	30	1	115	80	0	1	1	2
2	4	3	1	30	1	125	81	0	1	1	2
2	3	3	1	30	1	130	83	0	1	1	2
2	3	3	1	30	1	125	84	0	1	1	2
3	3	3	1	30	1	123	86	0	1	1	2
2	3	3	1	30	1	129	88	0	1	1	2
1	4	3	1	33	1	95	61	0	1	1	2
1	3	3	1	32	1	104	61	0	1	1	2
2	3	3	1	36	1	106	61	0	1	1	2
1	3	3	1	31	1	102	65	0	1	1	2
2	2	3	1	31	1	107	65	0	1	1	2
1	3	3	1	36	1	102	68	0	1	1	2
2	3	3	1	33	1	113	69	0	1	1	2
2	3	3	1	38	1	109	70	0	1	1	2
3	3	3	1	38	1	116	70	0	1	1	2
1	3	1	1	35	1	105	71	0	1	1	1
3	3	3	1	38	1	116	73	0	1	1	2
2	3	3	1	31	1	116	74	0	1	1	2
2	1	3	1	38	1	121	74	0	1	1	2
1	2	3	1	37	1	104	76	0	1	1	2
2	2	3	1	39	1	116	76	0	1	1	2
3	2	3	1	37	1	121	76	0	1	1	2
3	3	3	1	34	1	114	77	0	1	1	2
2	1	3	1	32	1	119	77	0	1	1	2
1	3	3	1	31	1	100	78	0	1	1	2
2	2	3	1	33	1	125	79	0	1	1	2
1	2	3	1	36	1	126	79	0	1	1	2
1	2	3	1	34	1	131	82	0	1	1	2
2	3	3	1	37	1	129	83	0	1	1	2
1	2	1	1	38	1	122	84	0	1	1	1
2	1	3	1	35	1	132	85	0	1	1	2
1	2	3	1	35	1	129	86	0	1	1	2
1	3	3	1	31	1	139	86	0	1	1	2
2	2	3	1	32	1	139	86	0	1	1	2
2	4	3	1	32	1	136	87	0	1	1	2
2	3	3	1	35	1	125	88	0	1	1	2
2	4	3	1	39	1	164	108	1	1	1	2
2	2	3	1	40	1	118	75	0	1	1	2
3	3	3	1	50	1	123	86	0	1	1	2
3	3	3	1	54	1	94	65	0	1	1	2
3	2	3	2	26	1	98	61	0	1	1	2
2	4	3	2	28	1	106	64	0	1	1	2
2	2	3	2	25	1	112	64	0	1	1	2
3	1	3	2	27	1	97	66	0	1	1	2
1	3	3	2	28	1	102	66	0	1	1	2
2	3	3	2	29	1	98	67	0	1	1	2
2	3	3	2	24	1	105	67	0	1	1	2
2	1	1	2	22	1	107	67	0	1	1	1
2	2	3	2	26	1	114	67	0	1	1	2
3	1	3	2	23	1	109	68	0	1	1	2
3	2	3	2	24	1	104	70	0	1	1	2
1	4	3	2	21	1	108	70	0	1	1	2
2	1	3	2	22	1	108	71	0	1	1	2
3	3	3	2	28	1	110	71	0	1	1	2
2	3	3	2	29	1	110	71	0	1	1	2
1	3	3	2	21	1	117	71	0	1	1	2
2	2	3	2	23	1	99	72	0	1	1	2
3	1	3	2	23	1	106	72	0	1	1	2
2	4	3	2	25	1	115	72	0	1	1	2
2	3	3	2	24	1	116	72	0	1	1	2
3	3	3	2	29	1	118	72	0	1	1	2
3	3	3	2	20	1	110	73	0	1	1	2
2	3	3	2	26	1	115	73	0	1	1	2
1	2	3	2	27	0	104	74	0	1	1	2
2	1	3	2	29	1	108	74	0	1	1	2
2	2	1	2	26	1	110	74	0	1	1	1
2	3	3	2	27	1	95	75	0	1	1	2
2	2	3	2	28	1	111	75	0	1	1	2
2	3	3	2	27	1	118	75	0	1	1	2
3	1	3	2	20	1	126	75	0	1	1	2
3	3	3	2	22	1	113	76	0	1	1	2
3	2	3	2	24	1	128	76	0	1	1	2
2	3	3	2	25	1	111	78	0	1	1	2
2	2	3	2	26	1	119	78	0	1	1	2
3	3	3	2	29	1	129	78	0	1	1	2
1	3	3	2	27	1	125	79	0	1	1	2
2	3	3	2	28	1	113	80	0	1	1	2
2	2	1	2	29	1	120	80	0	1	1	1
3	3	3	2	28	1	138	80	0	1	1	2
3	1	3	2	23	1	116	81	0	1	1	2
2	3	3	2	26	1	113	82	0	1	1	2
2	3	3	2	20	1	119	82	0	1	1	2
2	3	3	2	20	1	124	82	0	1	1	2
2	1	3	2	27	1	117	83	0	1	1	2
3	3	3	2	21	1	137	83	0	1	1	2
3	1	3	2	29	1	109	84	0	1	1	2
1	3	3	2	23	1	116	84	0	1	1	2
3	1	3	2	23	1	118	84	0	1	1	2
3	1	3	2	29	1	125	84	0	1	1	2
3	3	3	2	28	1	125	85	0	1	1	2
1	3	3	2	28	1	134	86	0	1	1	2
2	2	3	2	29	1	115	87	0	1	1	2
3	1	3	2	29	1	132	87	0	1	1	2
3	2	3	2	25	1	128	89	0	1	1	2
2	3	3	2	30	1	103	62	0	1	1	2
2	1	3	2	30	1	107	66	0	1	1	2
2	2	3	2	30	1	108	66	0	1	1	2
2	1	3	2	30	1	117	77	0	1	1	2
3	1	3	2	30	1	113	80	0	1	1	2
2	3	3	2	30	1	123	82	0	1	1	2
3	4	3	2	30	1	118	85	0	1	1	2
3	1	3	2	30	1	119	85	0	1	1	2
2	3	3	2	30	1	113	86	0	1	1	2
2	3	3	2	30	1	118	86	0	1	1	2
1	3	3	2	30	1	122	86	0	1	1	2
3	3	3	2	30	1	123	87	0	1	1	2
3	2	3	2	30	1	126	87	0	1	1	2
1	3	3	2	30	1	130	87	0	1	1	2
2	3	3	2	35	1	92	61	0	1	1	2
1	4	3	2	39	1	112	61	0	1	1	2
2	3	3	2	35	1	92	62	0	1	1	2
1	2	3	2	36	1	102	63	0	1	1	2
1	2	3	2	32	1	90	64	0	1	1	2
2	3	3	2	39	1	98	64	0	1	1	2
2	2	3	2	31	1	101	64	0	1	1	2
3	2	3	2	33	1	90	65	0	1	1	2
2	3	3	2	36	1	93	65	0	1	1	2
2	2	3	2	37	1	100	65	0	1	1	2
1	1	1	2	38	1	105	65	0	1	1	1
2	3	3	2	32	1	102	67	0	1	1	2
3	4	3	2	31	1	107	67	0	1	1	2
1	3	3	2	32	1	103	68	0	1	1	2
3	1	3	2	37	1	101	69	0	1	1	2
3	1	3	2	32	1	110	69	0	1	1	2
1	2	1	2	32	1	95	70	0	1	1	1
1	2	3	2	31	1	101	70	0	1	1	2
3	2	3	2	38	1	103	70	0	1	1	2
1	4	3	2	35	1	96	71	0	1	1	2
2	1	3	2	35	1	108	71	0	1	1	2
1	3	3	2	39	1	122	71	0	1	1	2
2	2	3	2	37	1	112	72	0	1	1	2
2	3	3	2	36	1	107	73	0	1	1	2
2	1	3	2	33	1	109	73	0	1	1	2
1	3	3	2	39	1	114	73	0	1	1	2
2	3	3	2	35	1	116	73	0	1	1	2
2	3	3	2	35	1	109	74	0	1	1	2
1	4	3	2	33	1	110	74	0	1	1	2
2	3	3	2	34	1	115	74	0	1	1	2
2	3	3	2	31	1	134	74	0	1	1	2
2	3	3	2	35	1	92	75	0	1	1	2
3	3	3	2	31	1	104	75	0	1	1	2
1	3	3	2	36	1	106	75	0	1	1	2
1	3	3	2	36	1	114	75	0	1	1	2
3	1	3	2	31	1	118	75	0	1	1	2
1	2	3	2	38	1	109	76	0	1	1	2
2	3	3	2	38	1	113	76	0	1	1	2
1	1	3	2	35	1	116	76	0	1	1	2
2	3	3	2	31	1	104	77	0	1	1	2
2	1	3	2	39	1	117	77	0	1	1	2
2	2	3	2	39	1	121	77	0	1	1	2
2	3	3	2	36	1	115	78	0	1	1	2
2	2	3	2	37	1	115	78	0	1	1	2
2	1	3	2	31	1	107	79	0	1	1	2
1	3	3	2	32	1	118	79	0	1	1	2
3	1	3	2	36	1	130	79	0	1	1	2
3	3	3	2	36	1	113	80	0	1	1	2
2	1	3	2	31	1	121	80	0	1	1	2
3	1	3	2	37	1	136	80	0	1	1	2
2	3	3	2	34	1	124	81	0	1	1	2
1	1	1	2	39	1	129	81	0	1	1	1
3	3	3	2	37	1	111	82	0	1	1	2
3	2	3	2	36	1	116	82	0	1	1	2
2	2	3	2	39	1	120	82	0	1	1	2
3	4	3	2	32	0	122	82	0	1	1	2
2	3	3	2	36	1	127	82	0	1	1	2
3	1	3	2	33	1	132	82	0	1	1	2
2	2	3	2	32	1	138	82	0	1	1	2
2	3	3	2	32	1	114	83	0	1	1	2
2	3	3	2	36	1	121	83	0	1	1	2
2	2	3	2	35	1	121	83	0	1	1	2
1	3	3	2	34	1	124	83	0	1	1	2
1	2	3	2	31	1	121	84	0	1	1	2
2	1	3	2	32	1	128	84	0	1	1	2
1	3	3	2	38	1	137	84	0	1	1	2
2	3	3	2	31	1	119	85	0	1	1	2
1	3	3	2	36	1	126	85	0	1	1	2
2	1	3	2	39	1	130	85	0	1	1	2
1	3	3	2	35	1	135	85	0	1	1	2
2	3	3	2	35	1	117	86	0	1	1	2
2	2	3	2	35	1	123	86	0	1	1	2
3	2	3	2	35	1	136	86	0	1	1	2
1	3	3	2	39	1	137	86	0	1	1	2
2	3	3	2	37	1	120	88	0	1	1	2
3	3	3	2	35	1	130	89	0	1	1	2
3	3	3	2	35	1	132	89	0	1	1	2
1	2	3	2	31	1	112	95	1	1	1	2
3	1	3	2	40	1	117	75	0	1	1	2
1	2	3	2	40	1	122	82	0	1	1	2
2	1	3	2	40	1	129	85	0	1	1	2
2	1	3	2	45	0	120	80	0	1	1	2
3	3	3	2	48	1	139	84	0	1	1	2
2	3	3	2	51	1	110	66	0	1	1	2
3	1	3	1	22	0	97	61	0	1	1	2
1	3	3	1	21	1	106	61	0	1	1	2
1	3	3	1	22	1	110	61	0	1	1	2
1	2	3	1	24	1	110	61	0	1	1	2
2	4	3	1	19	1	110	61	0	1	1	2
3	1	3	1	27	1	114	61	0	1	1	2
1	2	3	1	27	1	115	61	0	1	1	2
1	2	3	1	20	1	120	61	0	1	1	2
3	3	3	1	21	1	96	62	0	1	1	2
2	1	3	1	20	1	98	62	0	1	1	2
2	3	3	1	29	1	111	62	0	1	1	2
1	3	3	1	25	1	131	62	0	1	1	2
3	1	3	1	19	1	95	63	0	1	1	2
2	3	3	1	26	1	116	63	0	1	1	2
1	2	3	1	23	1	117	63	0	1	1	2
1	1	3	1	25	1	102	64	0	1	1	2
1	2	3	1	21	1	115	64	0	1	1	2
1	3	3	1	23	1	115	64	0	1	1	2
3	3	3	1	20	1	95	65	0	1	1	2
3	2	3	1	28	1	102	65	0	1	1	2
1	3	3	1	26	1	102	65	0	1	1	2
3	3	3	1	23	1	107	65	0	1	1	2
2	2	3	1	17	1	110	65	0	1	1	2
1	2	3	1	24	1	111	65	0	1	1	2
2	4	3	1	22	1	115	65	0	1	1	2
3	2	3	1	27	1	100	66	0	1	1	2
1	1	1	1	29	1	101	66	0	1	1	1
2	1	3	1	20	1	109	66	0	1	1	2
2	3	3	1	21	1	110	66	0	1	1	2
2	3	3	1	27	1	117	66	0	1	1	2
3	1	3	1	22	1	97	67	0	1	1	2
2	2	3	1	25	1	102	67	0	1	1	2
3	1	3	1	20	1	106	67	0	1	1	2
1	2	3	1	21	1	106	67	0	1	1	2
2	2	3	1	24	1	110	67	0	1	1	2
2	2	1	1	25	1	119	67	0	1	1	1
3	3	3	1	26	1	105	68	0	1	1	2
2	1	3	1	28	1	108	68	0	1	1	2
2	3	1	1	23	1	111	68	0	1	1	1
3	1	3	1	25	1	115	68	0	1	1	2
3	2	3	1	21	1	123	68	0	1	1	2
2	3	3	1	22	1	132	68	0	1	1	2
2	4	3	1	29	1	117	69	0	1	1	2
1	3	3	1	20	1	120	69	0	1	1	2
1	3	3	1	25	1	137	69	0	1	1	2
2	3	3	1	23	1	105	70	0	1	1	2
1	4	2	1	21	1	107	70	0	1	1	1
2	1	3	1	25	1	109	70	0	1	1	2
2	1	3	1	24	1	110	70	0	1	1	2
2	2	3	1	29	1	110	70	0	1	1	2
3	1	3	1	23	1	112	70	0	1	1	2
1	2	3	1	25	1	114	70	0	1	1	2
1	2	3	1	25	1	114	70	0	1	1	2
3	1	3	1	24	1	98	71	0	1	1	2
3	2	3	1	25	1	110	71	0	1	1	2
2	1	3	1	28	1	111	71	0	1	1	2
2	1	3	1	22	1	116	71	0	1	1	2
2	3	3	1	19	1	120	71	0	1	1	2
2	3	3	1	28	1	131	71	0	1	1	2
3	2	3	1	21	1	102	72	0	1	1	2
3	3	3	1	26	1	107	72	0	1	1	2
2	3	3	1	18	0	108	72	0	1	1	2
2	2	3	1	19	1	112	72	0	1	1	2
2	3	3	1	27	1	115	72	0	1	1	2
2	2	3	1	23	1	117	72	0	1	1	2
2	3	3	1	21	1	121	72	0	1	1	2
2	4	3	1	27	1	124	72	0	1	1	2
2	2	1	1	29	1	106	73	0	1	1	1
3	4	3	1	29	1	113	73	0	1	1	2
1	3	3	1	19	1	113	73	0	1	1	2
2	1	3	1	26	1	115	73	0	1	1	2
1	3	3	1	24	1	116	73	0	1	1	2
3	2	3	1	29	1	122	73	0	1	1	2
3	3	3	1	24	1	102	74	0	1	1	2
2	3	3	1	22	1	107	74	0	1	1	2
1	2	3	1	26	1	109	74	0	1	1	2
1	2	3	1	20	1	112	74	0	1	1	2
1	3	3	1	18	1	114	74	0	1	1	2
2	3	3	1	25	1	122	74	0	1	1	2
3	3	3	1	26	1	106	75	0	1	1	2
2	1	3	1	27	1	107	75	0	1	1	2
3	1	3	1	26	1	108	75	0	1	1	2
2	3	3	1	27	1	112	75	0	1	1	2
3	3	3	1	25	1	113	75	0	1	1	2
2	2	3	1	21	1	123	75	0	1	1	2
3	1	3	1	22	1	125	75	0	1	1	2
3	1	3	1	22	1	129	75	0	1	1	2
2	3	3	1	27	1	137	75	0	1	1	2
1	2	3	1	23	1	109	76	0	1	1	2
2	1	3	1	29	1	113	76	0	1	1	2
3	4	3	1	24	0	116	76	0	1	1	2
3	2	3	1	26	1	124	76	0	1	1	2
2	1	3	1	23	1	131	76	0	1	1	2
3	1	3	1	27	1	113	77	0	1	1	2
1	4	3	1	25	1	114	77	0	1	1	2
2	2	3	1	26	1	115	77	0	1	1	2
2	3	3	1	21	1	117	77	0	1	1	2
1	1	1	1	21	1	121	77	0	1	1	1
2	1	3	1	28	1	123	77	0	1	1	2
3	3	3	1	25	1	124	77	0	1	1	2
1	2	3	1	25	1	106	78	0	1	1	2
2	2	3	1	20	1	109	78	0	1	1	2
2	1	3	1	28	1	110	78	0	1	1	2
3	1	3	1	21	1	113	78	0	1	1	2
3	3	3	1	22	1	113	78	0	1	1	2
2	2	1	1	25	1	116	78	0	1	1	1
2	3	3	1	28	1	118	78	0	1	1	2
1	1	3	1	25	1	119	78	0	1	1	2
2	3	3	1	26	1	122	78	0	1	1	2
2	1	3	1	25	1	128	78	0	1	1	2
2	2	3	1	25	1	112	79	0	1	1	2
3	3	3	1	25	1	115	79	0	1	1	2
3	4	3	1	24	1	116	79	0	1	1	2
1	3	3	1	26	1	118	79	0	1	1	2
1	4	3	1	24	1	118	79	0	1	1	2
3	3	3	1	29	1	119	79	0	1	1	2
3	1	3	1	26	1	121	79	0	1	1	2
3	1	3	1	24	1	124	79	0	1	1	2
3	3	3	1	28	1	107	80	0	1	1	2
2	3	3	1	23	1	110	80	0	1	1	2
2	2	3	1	24	1	115	80	0	1	1	2
2	2	3	1	23	1	119	80	0	1	1	2
2	3	3	1	20	0	121	80	0	1	1	2
2	2	3	1	29	1	123	80	0	1	1	2
3	3	3	1	29	1	127	80	0	1	1	2
1	1	3	1	24	1	128	80	0	1	1	2
1	3	3	1	28	1	128	80	0	1	1	2
1	3	3	1	23	1	130	80	0	1	1	2
2	2	3	1	28	1	136	80	0	1	1	2
1	2	3	1	25	1	107	81	0	1	1	2
2	1	3	1	27	1	117	81	0	1	1	2
2	3	3	1	26	1	121	81	0	1	1	2
3	1	3	1	23	1	123	81	0	1	1	2
2	2	1	1	21	1	114	82	0	1	1	1
2	2	3	1	29	1	118	82	0	1	1	2
2	2	1	1	20	1	121	82	0	1	1	1
1	3	3	1	20	1	123	82	0	1	1	2
2	3	3	1	28	1	125	82	0	1	1	2
2	1	3	1	23	1	125	82	0	1	1	2
3	3	3	1	22	1	132	82	0	1	1	2
3	3	3	1	27	1	137	82	0	1	1	2
2	3	3	1	26	1	103	83	0	1	1	2
2	2	3	1	22	1	113	83	0	1	1	2
2	3	3	1	28	1	120	83	0	1	1	2
3	1	3	1	29	0	121	83	0	1	1	2
1	2	3	1	27	1	123	83	0	1	1	2
3	3	3	1	25	1	130	83	0	1	1	2
3	3	3	1	22	1	132	83	0	1	1	2
2	3	3	1	29	1	139	83	0	1	1	2
2	3	3	1	18	1	139	83	0	1	1	2
2	2	3	1	27	1	114	84	0	1	1	2
2	1	3	1	22	1	117	84	0	1	1	2
2	1	3	1	23	1	123	84	0	1	1	2
2	3	3	1	24	1	124	84	0	1	1	2
2	1	3	1	22	1	124	84	0	1	1	2
3	1	3	1	27	1	126	84	0	1	1	2
1	4	3	1	17	1	127	84	0	1	1	2
3	1	3	1	25	0	132	84	0	1	1	2
2	3	3	1	28	1	134	84	0	1	1	2
1	1	3	1	24	1	117	85	0	1	1	2
2	1	3	1	22	1	118	85	0	1	1	2
2	2	3	1	24	1	120	85	0	1	1	2
2	2	3	1	24	1	125	85	0	1	1	2
2	3	4	1	27	1	129	85	0	1	1	3
2	3	3	1	20	1	131	85	0	1	1	2
2	3	3	1	26	1	132	85	0	1	1	2
1	3	3	1	27	1	138	85	0	1	1	2
1	3	3	1	19	1	125	86	0	1	1	2
3	2	3	1	28	1	131	86	0	1	1	2
2	3	3	1	28	1	123	87	0	1	1	2
1	3	3	1	25	1	128	87	0	1	1	2
1	2	3	1	28	1	133	87	0	1	1	2
2	3	3	1	28	1	134	87	0	1	1	2
3	1	3	1	24	1	139	87	0	1	1	2
2	1	3	1	27	1	115	88	0	1	1	2
1	4	3	1	21	1	115	88	0	1	1	2
2	3	3	1	24	1	125	88	0	1	1	2
1	3	3	1	27	1	127	88	0	1	1	2
3	2	3	1	28	1	129	88	0	1	1	2
2	4	3	1	18	1	129	88	0	1	1	2
2	3	3	1	25	1	135	88	0	1	1	2
3	1	3	1	24	0	137	88	0	1	1	2
3	3	3	1	25	1	138	88	0	1	1	2
1	4	3	1	27	1	138	88	0	1	1	2
3	3	3	1	20	1	139	88	0	1	1	2
3	1	3	1	26	1	144	88	1	1	1	2
2	3	3	1	25	1	120	89	0	1	1	2
2	2	3	1	22	1	121	89	0	1	1	2
2	2	3	1	18	1	122	89	0	1	1	2
2	3	3	1	25	1	125	89	0	1	1	2
2	3	3	1	27	1	127	89	0	1	1	2
2	3	3	1	25	1	128	89	0	1	1	2
3	3	3	1	26	1	129	89	0	1	1	2
1	3	3	1	19	1	134	89	0	1	1	2
2	3	3	1	22	1	136	89	0	1	1	2
2	3	3	1	26	1	138	89	0	1	1	2
1	4	3	1	19	1	138	89	0	1	1	2
2	2	3	1	22	1	139	89	0	1	1	2
2	3	3	1	26	1	139	89	0	1	1	2
2	3	3	1	29	1	151	104	1	1	1	2
1	2	3	1	30	1	101	61	0	1	1	2
1	1	3	1	30	1	106	64	0	1	1	2
2	3	3	1	30	1	92	65	0	1	1	2
2	3	3	1	30	1	106	66	0	1	1	2
2	1	3	1	30	1	108	67	0	1	1	2
2	3	5	1	30	1	104	69	0	1	1	3
2	2	3	1	30	1	112	69	0	1	1	2
1	1	3	1	30	1	110	71	0	1	1	2
2	1	3	1	30	1	100	72	0	1	1	2
2	3	3	1	30	1	111	73	0	1	1	2
2	3	3	1	30	1	116	74	0	1	1	2
2	3	3	1	30	1	137	74	0	1	1	2
3	4	3	1	30	1	114	76	0	1	1	2
3	3	3	1	30	1	112	78	0	1	1	2
2	3	3	1	30	1	117	78	0	1	1	2
2	2	3	1	30	1	112	79	0	1	1	2
2	3	3	1	30	1	120	80	0	1	1	2
2	3	3	1	30	1	111	82	0	1	1	2
2	1	3	1	30	1	111	82	0	1	1	2
3	3	3	1	30	1	122	82	0	1	1	2
3	2	3	1	30	1	121	83	0	1	1	2
2	1	3	1	30	1	113	84	0	1	1	2
2	3	3	1	30	1	121	86	0	1	1	2
3	2	3	1	30	1	118	87	0	1	1	2
2	1	3	1	30	1	129	89	0	1	1	2
1	3	3	1	30	1	139	89	0	1	1	2
2	3	3	1	32	1	91	61	0	1	1	2
1	2	3	1	32	1	101	62	0	1	1	2
1	1	1	1	37	1	129	62	0	1	1	1
1	4	3	1	35	1	106	64	0	1	1	2
2	2	3	1	33	1	91	65	0	1	1	2
1	2	3	1	32	1	108	65	0	1	1	2
1	2	3	1	32	1	120	65	0	1	1	2
2	3	3	1	34	1	102	66	0	1	1	2
1	4	3	1	33	1	104	66	0	1	1	2
1	1	3	1	39	1	112	66	0	1	1	2
3	1	3	1	34	1	102	68	0	1	1	2
3	3	3	1	38	1	109	68	0	1	1	2
2	1	3	1	31	1	110	68	0	1	1	2
1	3	3	1	35	1	114	68	0	1	1	2
3	2	3	1	38	1	107	69	0	1	1	2
2	3	3	1	32	1	109	69	0	1	1	2
2	2	3	1	31	1	106	70	0	1	1	2
2	3	3	1	31	1	110	70	0	1	1	2
2	3	3	1	31	1	110	70	0	1	1	2
2	2	3	1	39	1	116	70	0	1	1	2
2	2	3	1	34	1	117	70	0	1	1	2
2	3	3	1	36	1	110	71	0	1	1	2
1	2	3	1	32	1	117	71	0	1	1	2
2	2	3	1	32	1	124	71	0	1	1	2
2	3	3	1	37	1	134	71	0	1	1	2
3	1	3	1	31	1	102	72	0	1	1	2
2	2	3	1	31	1	102	72	0	1	1	2
1	3	3	1	33	1	104	72	0	1	1	2
3	2	3	1	39	1	107	72	0	1	1	2
3	4	3	1	32	1	110	72	0	1	1	2
2	1	3	1	39	1	112	72	0	1	1	2
2	3	3	1	35	1	119	72	0	1	1	2
2	2	1	1	35	1	124	72	0	1	1	1
3	1	3	1	31	1	111	73	0	1	1	2
2	3	3	1	31	1	114	73	0	1	1	2
3	3	3	1	31	1	132	73	0	1	1	2
2	1	3	1	31	1	106	74	0	1	1	2
2	1	3	1	32	1	108	74	0	1	1	2
1	3	3	1	39	1	110	74	0	1	1	2
2	4	3	1	31	1	112	74	0	1	1	2
3	1	3	1	31	1	117	74	0	1	1	2
2	1	3	1	36	1	103	75	0	1	1	2
2	2	3	1	31	1	107	75	0	1	1	2
1	3	3	1	31	1	115	75	0	1	1	2
2	2	3	1	37	1	115	75	0	1	1	2
2	2	3	1	31	1	121	75	0	1	1	2
2	2	3	1	35	1	111	76	0	1	1	2
2	3	3	1	35	1	111	76	0	1	1	2
1	3	3	1	34	1	111	76	0	1	1	2
1	2	3	1	38	1	112	76	0	1	1	2
2	3	3	1	31	1	118	76	0	1	1	2
2	4	3	1	39	1	105	77	0	1	1	2
2	3	3	1	37	1	109	77	0	1	1	2
2	2	3	1	35	1	115	77	0	1	1	2
1	3	3	1	34	1	126	77	0	1	1	2
2	2	3	1	31	1	128	77	0	1	1	2
3	3	3	1	33	1	139	77	0	1	1	2
2	3	3	1	32	1	111	78	0	1	1	2
1	2	1	1	35	1	113	78	0	1	1	1
2	1	3	1	31	1	118	78	0	1	1	2
3	3	3	1	31	1	120	78	0	1	1	2
3	1	3	1	38	1	114	79	0	1	1	2
2	4	3	1	32	1	115	79	0	1	1	2
2	1	3	1	33	1	115	79	0	1	1	2
1	3	3	1	32	1	119	79	0	1	1	2
1	1	1	1	31	1	120	80	0	1	1	1
3	3	3	1	31	1	121	80	0	1	1	2
2	1	3	1	39	1	130	80	0	1	1	2
3	3	3	1	34	1	133	80	0	1	1	2
1	3	1	1	32	1	134	80	0	1	1	1
2	2	1	1	31	1	136	80	0	1	1	1
3	2	3	1	31	1	120	81	0	1	1	2
3	3	3	1	39	1	120	81	0	1	1	2
3	3	3	1	31	1	130	81	0	1	1	2
2	1	3	1	31	1	117	82	0	1	1	2
2	3	3	1	34	1	132	82	0	1	1	2
3	3	1	1	39	1	115	83	0	1	1	1
2	3	3	1	37	1	117	83	0	1	1	2
2	4	3	1	36	1	121	83	0	1	1	2
2	1	3	1	33	1	121	83	0	1	1	2
2	3	3	1	35	1	132	83	0	1	1	2
2	2	3	1	34	1	139	83	0	1	1	2
2	2	3	1	31	1	121	84	0	1	1	2
2	3	3	1	32	0	126	84	0	1	1	2
2	3	3	1	35	1	133	84	0	1	1	2
2	3	3	1	31	1	134	84	0	1	1	2
3	1	3	1	34	0	134	84	0	1	1	2
2	1	3	1	31	1	136	84	0	1	1	2
2	3	3	1	34	1	137	84	0	1	1	2
2	2	3	1	35	1	138	84	0	1	1	2
2	2	3	1	31	1	118	85	0	1	1	2
3	3	3	1	34	1	120	85	0	1	1	2
2	3	3	1	35	1	121	86	0	1	1	2
2	3	3	1	35	1	123	86	0	1	1	2
1	1	3	1	39	1	126	86	0	1	1	2
2	3	3	1	38	1	126	86	0	1	1	2
3	2	3	1	33	1	128	86	0	1	1	2
1	3	3	1	31	1	129	86	0	1	1	2
1	3	3	1	39	1	132	86	0	1	1	2
2	3	3	1	37	1	120	87	0	1	1	2
2	3	3	1	31	1	126	87	0	1	1	2
3	3	3	1	32	1	128	87	0	1	1	2
1	3	3	1	32	1	120	88	0	1	1	2
1	4	3	1	31	1	122	88	0	1	1	2
2	2	3	1	37	1	124	88	0	1	1	2
2	1	3	1	38	1	128	88	0	1	1	2
1	2	3	1	37	1	138	88	0	1	1	2
1	1	3	1	37	1	138	88	0	1	1	2
3	3	3	1	38	1	124	89	0	1	1	2
2	4	3	1	36	1	127	89	0	1	1	2
3	3	3	1	38	1	129	89	0	1	1	2
2	2	3	1	38	1	130	89	0	1	1	2
2	4	3	1	36	1	133	89	0	1	1	2
1	1	3	1	31	1	136	89	0	1	1	2
1	3	3	1	39	1	136	89	0	1	1	2
3	3	3	1	31	1	138	89	0	1	1	2
2	3	3	1	32	1	138	89	0	1	1	2
2	3	3	1	38	1	139	89	0	1	1	2
1	3	3	1	35	1	139	89	0	1	1	2
2	2	3	1	39	1	162	106	1	1	1	2
3	4	3	1	40	1	102	70	0	1	1	2
3	1	3	1	40	1	135	85	0	1	1	2
1	1	3	1	40	1	130	88	0	1	1	2
3	2	3	1	40	1	139	88	0	1	1	2
2	3	3	1	45	0	146	92	1	1	1	2
2	3	3	1	52	1	138	88	0	1	1	2
2	2	3	1	55	1	139	89	0	1	1	2
1	3	3	2	27	1	91	61	0	1	1	2
3	3	3	2	28	1	96	61	0	1	1	2
2	1	3	2	28	1	97	61	0	1	1	2
1	2	3	2	18	1	91	62	0	1	1	2
1	1	1	2	24	1	98	62	0	1	1	1
3	3	3	2	24	1	98	63	0	1	1	2
1	1	1	2	25	1	98	63	0	1	1	1
3	1	3	2	25	1	106	63	0	1	1	2
3	3	3	2	25	1	95	64	0	1	1	2
2	3	3	2	29	1	103	64	0	1	1	2
3	2	3	2	27	1	109	64	0	1	1	2
3	4	3	2	28	1	139	64	0	1	1	2
2	2	3	2	27	1	102	65	0	1	1	2
3	1	3	2	26	1	103	65	0	1	1	2
1	2	3	2	27	1	115	66	0	1	1	2
2	3	3	2	21	1	119	66	0	1	1	2
2	1	3	2	22	1	107	67	0	1	1	2
3	3	3	2	25	1	108	67	0	1	1	2
2	3	3	2	29	1	117	68	0	1	1	2
2	1	3	2	26	1	101	69	0	1	1	2
2	1	3	2	21	1	102	69	0	1	1	2
3	1	3	2	21	1	105	69	0	1	1	2
2	2	3	2	28	1	106	70	0	1	1	2
2	1	3	2	22	1	109	70	0	1	1	2
3	3	3	2	24	1	119	70	0	1	1	2
3	1	3	2	23	1	112	71	0	1	1	2
2	1	3	2	25	1	103	72	0	1	1	2
2	1	3	2	27	1	103	72	0	1	1	2
3	2	3	2	25	1	108	72	0	1	1	2
2	3	3	2	21	1	109	72	0	1	1	2
3	3	3	2	29	1	114	72	0	1	1	2
2	3	3	2	25	1	114	72	0	1	1	2
3	1	3	2	29	1	107	73	0	1	1	2
1	3	3	2	26	1	108	73	0	1	1	2
3	1	3	2	25	1	109	73	0	1	1	2
3	1	3	2	25	1	113	73	0	1	1	2
2	1	3	2	29	1	104	74	0	1	1	2
1	4	3	2	29	1	105	74	0	1	1	2
2	2	1	2	28	1	106	74	0	1	1	1
2	3	3	2	25	1	114	74	0	1	1	2
2	1	3	2	29	1	108	75	0	1	1	2
2	3	3	2	27	1	111	75	0	1	1	2
3	1	3	2	28	1	121	75	0	1	1	2
3	3	3	2	25	1	104	76	0	1	1	2
2	2	3	2	24	1	111	78	0	1	1	2
2	1	3	2	29	1	112	78	0	1	1	2
1	1	1	2	26	1	102	79	0	1	1	1
3	3	3	2	27	1	108	79	0	1	1	2
2	1	3	2	29	1	112	79	0	1	1	2
3	3	3	2	25	1	114	80	0	1	1	2
1	3	5	2	27	1	114	80	0	1	1	3
3	1	3	2	22	1	118	81	0	1	1	2
2	3	3	2	21	1	112	82	0	1	1	2
2	2	3	2	26	1	124	82	0	1	1	2
3	1	3	2	28	1	127	82	0	1	1	2
2	3	3	2	25	1	117	83	0	1	1	2
2	2	3	2	22	1	127	83	0	1	1	2
1	3	3	2	19	1	125	84	0	1	1	2
2	1	3	2	28	1	125	85	0	1	1	2
2	3	3	2	25	1	125	85	0	1	1	2
1	2	3	2	19	1	122	88	0	1	1	2
3	3	3	2	26	1	123	88	0	1	1	2
2	3	3	2	21	1	125	88	0	1	1	2
2	2	3	2	28	1	130	88	0	1	1	2
3	3	3	2	26	1	131	88	0	1	1	2
3	1	3	2	23	1	123	89	0	1	1	2
2	3	3	2	23	1	133	89	0	1	1	2
2	3	3	2	25	1	139	89	0	1	1	2
2	3	3	2	30	1	103	66	0	1	1	2
2	2	3	2	30	1	103	70	0	1	1	2
3	1	3	2	30	1	103	76	0	1	1	2
1	3	3	2	30	1	120	79	0	1	1	2
3	4	3	2	30	1	127	85	0	1	1	2
3	3	3	2	31	1	96	61	0	1	1	2
1	1	1	2	32	1	99	61	0	1	1	1
3	1	3	2	37	1	109	62	0	1	1	2
3	3	3	2	32	1	101	63	0	1	1	2
3	3	3	2	36	1	91	65	0	1	1	2
2	3	3	2	31	1	108	68	0	1	1	2
3	2	3	2	38	1	111	68	0	1	1	2
3	3	3	2	35	1	96	69	0	1	1	2
2	1	3	2	34	1	107	69	0	1	1	2
3	1	3	2	39	1	107	69	0	1	1	2
3	1	3	2	37	1	99	71	0	1	1	2
2	2	3	2	36	1	110	71	0	1	1	2
2	3	3	2	35	1	112	71	0	1	1	2
3	3	3	2	32	1	118	71	0	1	1	2
2	2	3	2	31	1	107	72	0	1	1	2
3	1	3	2	35	1	112	72	0	1	1	2
3	1	3	2	38	1	114	72	0	1	1	2
1	3	3	2	37	1	116	73	0	1	1	2
2	4	3	2	38	1	131	73	0	1	1	2
3	3	3	2	32	1	121	74	0	1	1	2
2	2	3	2	32	1	114	75	0	1	1	2
2	3	3	2	38	1	110	76	0	1	1	2
1	3	3	2	37	1	116	76	0	1	1	2
1	3	3	2	38	1	110	77	0	1	1	2
3	1	3	2	33	1	108	78	0	1	1	2
2	3	3	2	35	1	111	78	0	1	1	2
3	3	3	2	32	1	113	78	0	1	1	2
1	3	3	2	38	1	114	78	0	1	1	2
1	2	1	2	37	1	116	78	0	1	1	1
2	2	3	2	39	1	118	78	0	1	1	2
1	3	3	2	32	1	115	79	0	1	1	2
2	3	3	2	31	1	116	80	0	1	1	2
2	3	3	2	32	1	116	80	0	1	1	2
2	3	3	2	36	1	136	82	0	1	1	2
3	3	3	2	34	1	121	84	0	1	1	2
1	1	3	2	39	1	127	84	0	1	1	2
3	4	3	2	36	1	131	84	0	1	1	2
3	3	3	2	38	1	133	84	0	1	1	2
3	1	3	2	38	1	128	85	0	1	1	2
1	4	3	2	37	1	118	87	0	1	1	2
2	3	3	2	31	1	135	88	0	1	1	2
3	1	3	2	38	1	126	89	0	1	1	2
1	2	1	2	36	1	139	89	0	1	1	1
2	3	3	2	36	1	155	102	1	1	1	2
3	1	3	2	40	1	105	69	0	1	1	2
3	1	3	2	40	0	110	73	0	1	1	2
3	2	3	2	40	1	117	77	0	1	1	2
2	4	3	2	45	1	109	65	0	1	1	2
2	4	3	2	48	1	131	66	0	1	1	2
2	2	3	2	41	1	110	67	0	1	1	2
3	2	3	2	42	1	120	68	0	1	1	2
2	3	3	2	45	1	127	68	0	1	1	2
2	2	3	2	48	1	102	70	0	1	1	2
1	4	3	2	42	1	108	71	0	1	1	2
1	2	3	2	41	1	118	80	0	1	1	2
2	2	3	2	42	1	125	82	0	1	1	2
2	2	3	2	42	1	138	82	0	1	1	2
2	3	3	2	48	1	122	86	0	1	1	2
2	2	3	2	46	1	130	88	0	1	1	2
1	3	3	1	22	1	84	50	0	1	1	2
1	2	3	1	19	1	90	56	0	1	1	2
2	2	1	1	20	1	112	60	0	1	1	1
2	2	1	1	21	1	120	60	0	1	1	1
1	2	3	1	28	1	91	61	0	1	1	2
2	4	3	1	27	1	94	61	0	1	1	2
1	3	3	1	19	1	95	61	0	1	1	2
3	3	3	1	23	1	95	61	0	1	1	2
2	1	3	1	28	1	96	61	0	1	1	2
1	3	3	1	24	1	99	61	0	1	1	2
1	2	3	1	22	1	101	61	0	1	1	2
2	1	3	1	23	1	103	61	0	1	1	2
1	3	1	1	25	1	104	61	0	1	1	1
1	2	3	1	24	1	104	61	0	1	1	2
1	3	3	1	21	1	105	61	0	1	1	2
3	1	3	1	27	1	106	61	0	1	1	2
2	1	3	1	24	1	106	61	0	1	1	2
1	3	3	1	23	1	107	61	0	1	1	2
2	3	3	1	29	1	107	61	0	1	1	2
1	3	3	1	18	1	109	61	0	1	1	2
1	3	3	1	20	1	110	61	0	1	1	2
3	1	3	1	27	1	112	61	0	1	1	2
1	2	3	1	20	1	112	61	0	1	1	2
1	4	3	1	20	1	118	61	0	1	1	2
1	2	3	1	22	1	118	61	0	1	1	2
1	3	3	1	23	1	120	61	0	1	1	2
2	2	3	1	27	1	93	62	0	1	1	2
2	1	3	1	18	1	96	62	0	1	1	2
2	2	3	1	17	1	98	62	0	1	1	2
1	2	3	1	26	1	100	62	0	1	1	2
3	3	3	1	21	1	102	62	0	1	1	2
1	2	3	1	25	1	106	62	0	1	1	2
2	3	3	1	24	1	107	62	0	1	1	2
2	2	3	1	26	1	108	62	0	1	1	2
1	1	1	1	28	1	110	62	0	1	1	1
1	2	3	1	27	1	112	62	0	1	1	2
2	3	3	1	24	1	119	62	0	1	1	2
2	3	3	1	21	1	122	62	0	1	1	2
1	3	3	1	21	1	125	62	0	1	1	2
2	1	3	1	21	1	95	63	0	1	1	2
3	1	3	1	28	1	100	63	0	1	1	2
2	1	3	1	29	1	109	63	0	1	1	2
1	2	3	1	22	1	113	63	0	1	1	2
2	2	3	1	22	1	117	63	0	1	1	2
1	2	3	1	25	1	118	63	0	1	1	2
1	3	3	1	23	1	122	63	0	1	1	2
2	1	3	1	26	1	98	64	0	1	1	2
2	1	3	1	23	1	102	64	0	1	1	2
2	1	3	1	26	1	105	64	0	1	1	2
1	2	3	1	27	1	107	64	0	1	1	2
2	1	3	1	29	1	110	64	0	1	1	2
3	3	3	1	22	1	94	65	0	1	1	2
1	2	1	1	22	1	95	65	0	1	1	1
2	3	3	1	25	1	103	65	0	1	1	2
3	3	3	1	27	1	105	65	0	1	1	2
3	1	3	1	25	1	107	65	0	1	1	2
2	3	3	1	21	1	107	65	0	1	1	2
2	4	3	1	26	1	108	65	0	1	1	2
1	3	3	1	23	1	111	65	0	1	1	2
1	3	1	1	25	1	111	65	0	1	1	1
1	1	3	1	28	1	112	65	0	1	1	2
2	4	3	1	25	1	127	65	0	1	1	2
2	2	3	1	18	1	95	66	0	1	1	2
1	4	3	1	21	1	98	66	0	1	1	2
3	1	3	1	27	1	99	66	0	1	1	2
1	3	3	1	24	1	104	66	0	1	1	2
1	4	3	1	20	1	104	66	0	1	1	2
2	3	3	1	22	1	106	66	0	1	1	2
2	2	3	1	22	1	106	66	0	1	1	2
2	2	3	1	28	1	107	66	0	1	1	2
1	3	3	1	19	1	108	66	0	1	1	2
2	3	3	1	23	1	109	66	0	1	1	2
2	3	3	1	25	1	109	66	0	1	1	2
1	2	3	1	20	0	110	66	0	1	1	2
2	3	3	1	29	1	110	66	0	1	1	2
1	2	3	1	24	1	111	66	0	1	1	2
2	2	3	1	28	1	113	66	0	1	1	2
1	3	3	1	23	1	113	66	0	1	1	2
2	2	3	1	25	1	115	66	0	1	1	2
1	3	1	1	23	1	118	66	0	1	1	1
1	2	3	1	22	1	122	66	0	1	1	2
2	3	3	1	25	1	100	67	0	1	1	2
2	3	3	1	27	1	101	67	0	1	1	2
1	4	3	1	17	1	104	67	0	1	1	2
2	1	3	1	24	1	106	67	0	1	1	2
2	1	3	1	20	1	106	67	0	1	1	2
2	2	1	1	23	1	106	67	0	1	1	1
2	3	3	1	26	1	109	67	0	1	1	2
2	2	3	1	29	1	113	67	0	1	1	2
2	2	3	1	27	1	113	67	0	1	1	2
1	3	3	1	18	1	116	67	0	1	1	2
3	2	3	1	19	1	118	67	0	1	1	2
1	3	3	1	25	1	121	67	0	1	1	2
1	3	3	1	21	1	129	67	0	1	1	2
1	1	3	1	27	1	97	68	0	1	1	2
2	3	3	1	28	1	99	68	0	1	1	2
3	2	3	1	19	1	102	68	0	1	1	2
2	1	3	1	22	1	104	68	0	1	1	2
3	1	3	1	22	1	106	68	0	1	1	2
2	1	3	1	24	1	108	68	0	1	1	2
3	3	3	1	27	1	109	68	0	1	1	2
2	3	3	1	18	1	114	68	0	1	1	2
3	3	3	1	27	1	118	68	0	1	1	2
1	2	3	1	23	1	120	68	0	1	1	2
1	3	3	1	20	1	122	68	0	1	1	2
1	2	3	1	21	1	122	68	0	1	1	2
2	1	3	1	28	1	102	69	0	1	1	2
2	1	3	1	25	1	105	69	0	1	1	2
2	3	3	1	22	1	105	69	0	1	1	2
2	2	3	1	23	1	109	69	0	1	1	2
3	2	3	1	19	1	109	69	0	1	1	2
2	2	3	1	19	1	110	69	0	1	1	2
3	4	3	1	29	1	111	69	0	1	1	2
2	3	3	1	25	1	112	69	0	1	1	2
1	3	3	1	23	1	113	69	0	1	1	2
1	2	3	1	25	1	114	69	0	1	1	2
2	3	3	1	24	1	121	69	0	1	1	2
1	2	3	1	24	1	121	69	0	1	1	2
3	1	3	1	28	1	126	69	0	1	1	2
2	1	3	1	27	1	97	70	0	1	1	2
2	1	3	1	19	1	103	70	0	1	1	2
2	2	3	1	25	1	103	70	0	1	1	2
3	4	3	1	28	1	104	70	0	1	1	2
2	2	3	1	29	1	104	70	0	1	1	2
2	1	3	1	22	1	104	70	0	1	1	2
2	2	3	1	17	1	107	70	0	1	1	2
2	2	3	1	20	1	107	70	0	1	1	2
3	1	3	1	26	1	108	70	0	1	1	2
2	1	3	1	29	1	109	70	0	1	1	2
3	2	3	1	27	1	110	70	0	1	1	2
3	1	3	1	28	1	111	70	0	1	1	2
2	2	3	1	27	1	111	70	0	1	1	2
2	3	3	1	21	1	114	70	0	1	1	2
3	1	3	1	23	1	114	70	0	1	1	2
3	1	3	1	24	1	114	70	0	1	1	2
2	1	1	1	28	1	116	70	0	1	1	1
1	3	3	1	29	1	118	70	0	1	1	2
3	2	3	1	27	1	120	70	0	1	1	2
3	3	3	1	21	1	121	70	0	1	1	2
2	2	1	1	19	1	123	70	0	1	1	1
1	2	3	1	24	1	124	70	0	1	1	2
2	3	3	1	20	1	128	70	0	1	1	2
1	2	3	1	27	1	128	70	0	1	1	2
2	4	3	1	27	1	129	70	0	1	1	2
1	2	3	1	19	1	136	70	0	1	1	2
2	2	3	1	27	1	98	71	0	1	1	2
1	2	3	1	25	1	100	71	0	1	1	2
2	1	3	1	27	1	102	71	0	1	1	2
2	1	3	1	29	1	106	71	0	1	1	2
3	1	3	1	23	1	109	71	0	1	1	2
2	2	3	1	22	1	110	71	0	1	1	2
2	2	3	1	27	1	110	71	0	1	1	2
1	3	3	1	18	1	111	71	0	1	1	2
1	3	1	1	24	1	111	71	0	1	1	1
2	2	3	1	23	1	112	71	0	1	1	2
2	2	3	1	23	1	113	71	0	1	1	2
1	2	3	1	25	1	114	71	0	1	1	2
3	3	3	1	24	1	118	71	0	1	1	2
2	4	3	1	22	1	121	71	0	1	1	2
1	3	3	1	22	1	126	71	0	1	1	2
3	3	3	1	21	1	106	72	0	1	1	2
1	2	3	1	20	1	107	72	0	1	1	2
3	1	3	1	22	1	108	72	0	1	1	2
3	3	3	1	28	1	108	72	0	1	1	2
3	3	3	1	23	1	110	72	0	1	1	2
2	1	3	1	27	1	110	72	0	1	1	2
3	1	3	1	25	1	111	72	0	1	1	2
2	1	3	1	23	1	115	72	0	1	1	2
1	3	3	1	20	1	116	72	0	1	1	2
1	3	3	1	27	1	116	72	0	1	1	2
2	1	3	1	21	1	120	72	0	1	1	2
2	1	3	1	23	1	120	72	0	1	1	2
3	1	3	1	26	0	137	72	0	1	1	2
3	1	3	1	27	0	110	73	0	1	1	2
1	1	3	1	22	1	115	73	0	1	1	2
3	4	3	1	23	1	115	73	0	1	1	2
2	2	3	1	28	1	119	73	0	1	1	2
1	4	3	1	20	1	119	73	0	1	1	2
2	2	3	1	29	1	121	73	0	1	1	2
2	2	3	1	19	1	123	73	0	1	1	2
1	2	3	1	27	1	124	73	0	1	1	2
2	3	3	1	22	1	125	73	0	1	1	2
1	3	3	1	22	1	126	73	0	1	1	2
2	3	3	1	19	1	126	73	0	1	1	2
3	3	3	1	28	1	129	73	0	1	1	2
2	3	3	1	24	1	98	74	0	1	1	2
2	2	3	1	23	1	102	74	0	1	1	2
2	3	3	1	24	1	103	74	0	1	1	2
1	3	1	1	24	1	105	74	0	1	1	1
1	2	3	1	19	1	106	74	0	1	1	2
2	3	3	1	24	1	107	74	0	1	1	2
2	3	3	1	26	1	108	74	0	1	1	2
2	2	3	1	28	1	110	74	0	1	1	2
1	3	3	1	27	1	114	74	0	1	1	2
2	2	3	1	23	1	115	74	0	1	1	2
2	1	3	1	21	1	115	74	0	1	1	2
2	3	3	1	25	1	115	74	0	1	1	2
1	2	3	1	25	1	116	74	0	1	1	2
3	3	3	1	23	1	117	74	0	1	1	2
3	2	3	1	27	1	117	74	0	1	1	2
2	3	3	1	24	1	117	74	0	1	1	2
2	2	3	1	23	1	118	74	0	1	1	2
3	3	3	1	28	1	119	74	0	1	1	2
2	3	3	1	25	1	119	74	0	1	1	2
1	2	3	1	22	1	120	74	0	1	1	2
3	4	3	1	22	1	122	74	0	1	1	2
1	4	3	1	21	1	128	74	0	1	1	2
2	2	1	1	27	0	128	74	0	1	1	1
1	3	3	1	26	1	131	74	0	1	1	2
3	1	3	1	28	1	136	74	0	1	1	2
3	1	3	1	21	1	99	75	0	1	1	2
3	1	3	1	24	0	103	75	0	1	1	2
1	2	3	1	26	1	107	75	0	1	1	2
3	3	3	1	21	1	111	75	0	1	1	2
2	4	3	1	23	1	111	75	0	1	1	2
3	3	3	1	22	1	113	75	0	1	1	2
2	1	3	1	26	1	113	75	0	1	1	2
[truncated: 19,404 more rows]
